# Supplementary material for: Catalyst-free synthesis of 3-sulfone nitrile from sulfonyl hydrazides and acrylonitrile in water
Source: Royal Society of Chemistry journal article supplement (doi:10.1039/c7ob01558e), 2017-01-01

# Catalyst-free Synthesis of 3-Sulfone Nitrile from Sulfonyl Hydrazides and Acrylonitrile in Water

Wei Li,<sup>†</sup> Lingfeng Gao,<sup>\*,†</sup> Wenyun Zhuge,<sup>†</sup> Xu Sun,<sup>†</sup> Gengxiu Zheng<sup>\*,†</sup>

<sup>†</sup>School of Chemistry and Chemical Engineering, University of Jinan, Jinan 250022, P.R. China.

School of Chemistry and Chemical Engineering, University of Jinan,

Jinan, 250022, Shandong, P.R. China

Tel.: +8653182765841.

E-mail: chm\_zhenggx@ujn.edu.cn. chm\_gaolf@mail.ustc.edu.cn

## Contents:

|                                         |         |
|-----------------------------------------|---------|
| General remarks                         | S1      |
| Optimization of the reaction            | S2-S3   |
| Synthesis of substrates                 | S3      |
| Control Experiment                      | S3-S5   |
| Characterization data of all substances | S4-S15  |
| NMR Spectra of all compounds            | S15-S35 |

**General Remarks:** Unless otherwise indicated, all commercially available reagents and solvents were used directly from the supplier without further purification. <sup>1</sup>HNMR and <sup>13</sup>CNMR were recorded at ambient temperature in CDCl<sub>3</sub> (7.27 ppm). DMSO (2.5 ppm) Chemical shift values are expressed as parts per million (ppm) and J values are in Hertz. Splitting patterns are indicated as s: singlet, d: doublet, t: triplet, q: quartet or combination, br. s broad singlet or m: multiplet. Infrared samples were

recorded on a Perkin-Elmer 2000FTIR spectrometer. HRMS were recorded on the TOF-HRMS-EI at the Instruments' Center for Physical Science, University of Ji Nan. All reactions were carried out in a thick-walled glass tube (15 mL or 38 mL, purchased from Beijing Synthware Glass (<http://www.xinweier.com/>), also named 'thick wall pressure pipe') unless otherwise indicated.

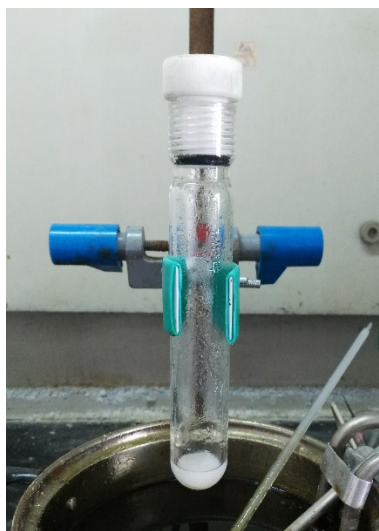

Thick-walled glass tube

**Table S1** Optimization of the reaction solvent<sup>a</sup>

| Entry | Solvent            | T/°C | Yield <sup>b</sup> (%) |
|-------|--------------------|------|------------------------|
| 1     | DMF                | 80   | Trace                  |
| 2     | DMSO               | 80   | -                      |
| 3     | Toluene            | 80   | -                      |
| 4     | CH <sub>3</sub> CN | 80   | Trace                  |
| 5     | THF                | 80   | Trace                  |
| 6     | Dioxane            | 80   | Trace                  |
| 7     | CH <sub>3</sub> OH | 80   | 21                     |

Reaction conditions: <sup>a</sup> The reactions were carried out with **1a** (0.5 mmol, 96.1 mg, 1 eq.), **2a** (1 mmol, 0.065 mL, 2 eq.), water (1 mL), at 80 °C for 10 h. <sup>b</sup> Yield of isolated product is based on the sulfonyl hydrazine.

## Synthesis of substrates 3a-3i and the results of proving experiments

### 1.1 Synthesis of substrates 1a-1i, control experiment, 3aa-3ai, 3ab-3fc and Characterization data

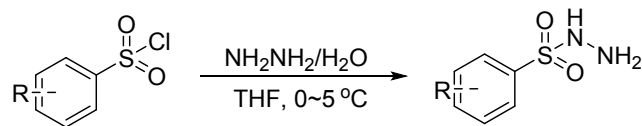

R= H, CH<sub>3</sub>, NO<sub>2</sub>, CH<sub>3</sub>O, tBu, 2,4,6-triisopropyl, thieryl, fluorine.

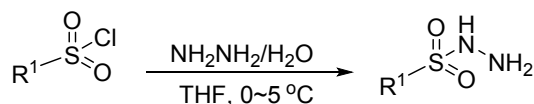

R<sup>1</sup>= Bn, thieryl.

Scheme S1. The synthesizing route of substrates **1a-1i**

References:

- (1) C. R. Liu, L. H. Ding, G. Guo, W. W. Liu, Fu-Lai Yang, *Org. Biomol. Chem.*, 2016, **14**, 2824.
- (2) J. A. Kishor, J., Nidhi, *Chem. Commu.*, 2016, **52**, 1831.

### Control Experiment of base was added into the reaction system

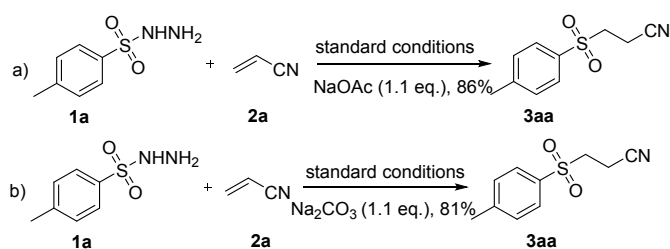

Scheme S2. base was added into the reaction system.

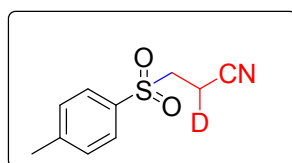

Figure S1. The structure of the **D-3aa**.

Acquired by : System Administrator  
 Sample Name : LCMS62-PH-ZHS-XZ5-1-460-0-1(MCHEN-001E1)1T  
 Injection Volume : 1  
 Data File : LCMS62-PH-ZHS-XZ5-1-460-0-1(MCHEN-001E1)1T.lcd  
 Report Format File : lib format 27 June 2013.lsr  
 Date Acquired : 7/18/2017 3:02:42 PM  
 Comment : Mobile Phase A:Water/0.05% TFA ; Mobile phase B:ACN/0.05% TFA

Instrument Name:Shimadzu LCMS-2020

<<Pump>>

Mode : Binary gradient  
 Pump A : LC-20ADXR  
 Pump B : LC-20ADXR  
 Total Flow : 1.2000 mL/min  
 B Conc. : 5.0 %

<<Interface>>

Interface : ESI  
 DL Temperature : 250 C  
 Nebulizing Gas Flow : 1.50 L/min  
 Heat Block : 250 C  
 Drying Gas : On  
 15.00 L/min

<<Oven>>

Oven Temperature : 40 C

<<MS Parameter>>

--Segment 1 Event 1--  
 Start Time : 0.00 min  
 End Time : 2.00 min  
 Acquisition Mode : Scan  
 Polarity : Positive  
 Event Time : 0.50 sec  
 Detector Voltage : +1.15 kV  
 Threshold : 0  
 Start m/z : 90.00  
 End m/z : 900.00  
 Scan Speed : 1667 u/sec  
 Interface Volt. : Use the Data in the Tuning File  
 DL Volt. : Use the Data in the Tuning File  
 Qarray DC Voltage : Use the Data in the Tuning File  
 Qarray DC Voltage : Use the Data in the Tuning File

System Configuration

<<Column>>

Column Name : Shim-pack XR-ODS  
 Length : 50 mm  
 Internal Diameter : 3.0 mm  
 Description : 2.2 um

<<LC Time Program>>

| Time | Module     | Command      | Value |
|------|------------|--------------|-------|
| 0.01 | Pumps      | Pump B Conc. | 5     |
| 1.10 | Pumps      | Pump B Conc. | 100   |
| 1.70 | Pumps      | Pump B Conc. | 100   |
| 1.75 | Pumps      | Pump B Conc. | 5     |
| 2.00 | Controller | Stop         |       |

<Chromatogram>

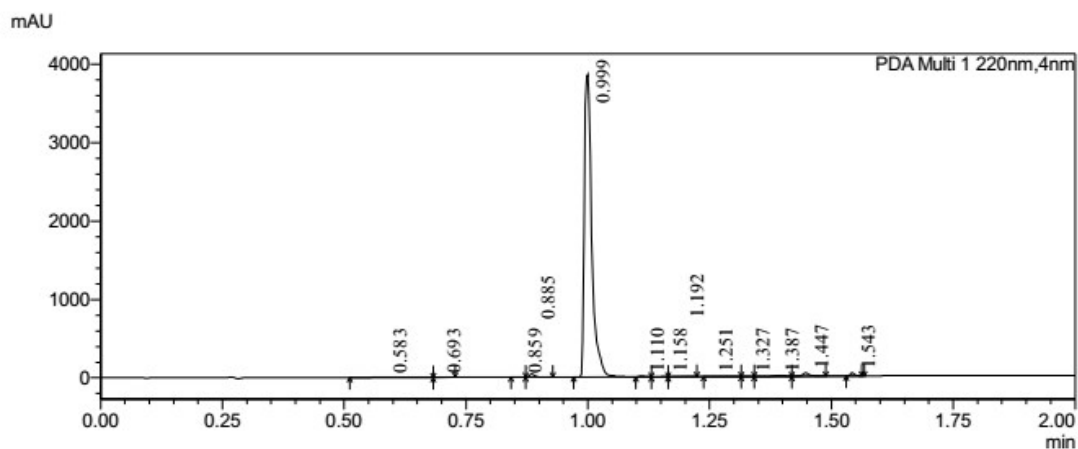

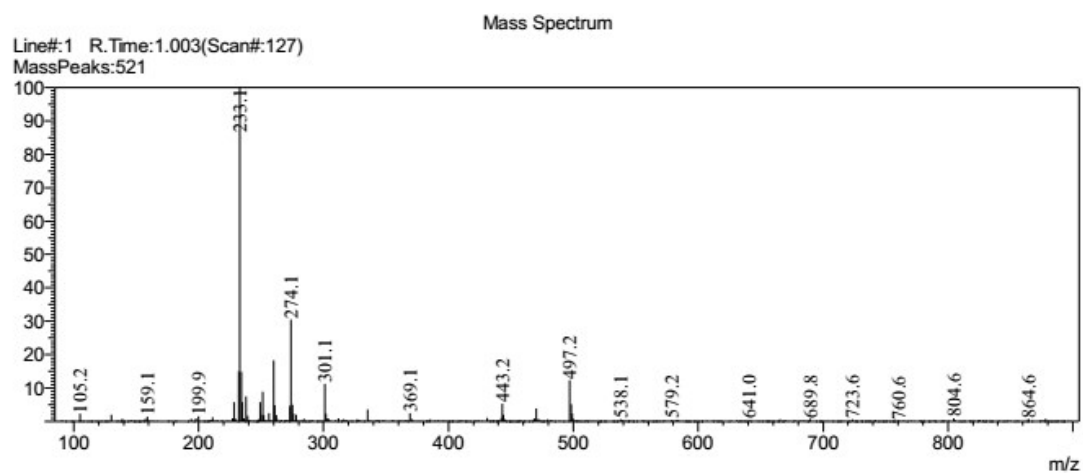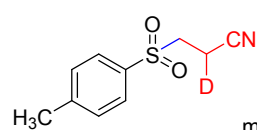

Chemical Formula:  $C_{10}H_{10}DNO_2S$   
 Exact Mass: 210.06  
 Molecular Weight: 210.27  
 m/z: 210.06 (100.0%), 211.06 (10.8%), 212.05 (4.5%)

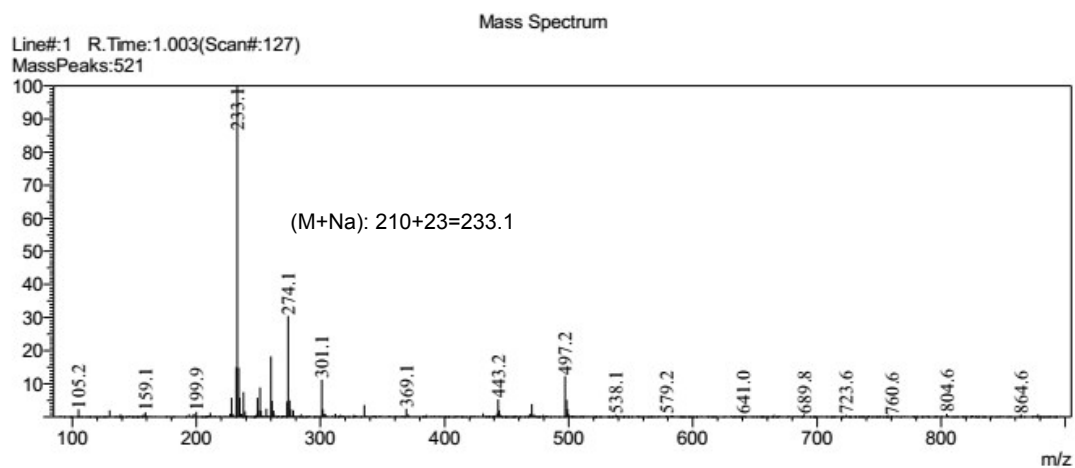

Figure S2. LCMS data of the compound D-3aa.

### 3aa-3ai, 3ab-3fc and Characterization data

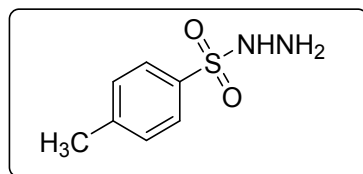

**1a**, 4-methylbenzenesulfonylhydrazide

To a stirred solution of tetrahydrofuran (5 mL) at 0 °C, 0.5 g benzene sulfonyl chloride was added. The resultant mixture was stirred for 2 minutes. Then 2 mL hydrazine hydrate was dropwise added at 0 °C. The solution was stirred for 25 minutes. The mixed solution was extracted. Organic phase was collected and dried with anhydrous sodium sulfate and concentrated under reduced pressure to get white solid. <sup>1</sup>HNMR (400 MHz, CDCl<sub>3</sub>) δ 8.05-7.68 (m, 2H), 7.38 (d, *J* = 8.0 Hz, 2H), 5.77 (s, 1H), 3.50 (s, 2H), 2.47 (s, 3H).

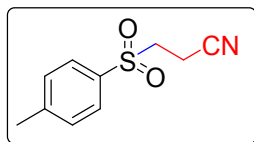

**3aa**, 3-tosylpropanenitrile<sup>lit. (1)</sup>

4-methylbenzenesulfo hydrazide (0.5 mmol, 96.1 mg), acrylonitrile (1mmol, 0.065 mL) and water (1 mL) were added in a thick-walled glass tube. The resultant mixture was stirred at 80 °C under magnetic stirring for 10 h. After the reaction was completed, the reaction solution was cooled to room temperature. The mixture was extracted with EtOAc (2 × 50 mL) and then the combined organic extracts were washed with brine for three times (3 × 10 mL), dried over sodium sulfate, and filtered. The solvent was removed under reduced pressure and the residue was purified by column chromatography (EtOAc: petroleum ether =1: 2) a light white solid (99.4 mg, yield of 95%). <sup>1</sup>HNMR (400 MHz, CDCl<sub>3</sub>) δ 7.80 (d, *J* = 8.3 Hz, 2H), 7.39 (d, *J* = 8.0 Hz, 2H), 3.63-3.23 (m, 2H), 2.92-2.72 (m, 2H), 2.47 (s, 3H). <sup>13</sup>CNMR (100 MHz, CDCl<sub>3</sub>) δ 130.5, 128.3, 116.1, 29.5, 21.5, 12.2. Anal. Calcd for C<sub>10</sub>H<sub>11</sub>NO<sub>2</sub>S: C, 57.42; H, 5.31; N, 6.67; S, 15.32. Found: C, 57.35; H, 5.21; N, 6.58; S, 15.21. IR (liquidfilm, cm<sup>-1</sup>): ν = 3421, 2853, 2244, 1594, 1384, 1148, 1302. HRMS (TOF-HRMS-EI): calcd for C<sub>10</sub>H<sub>11</sub>NO<sub>2</sub>S: 209.0508, found 209.0499.

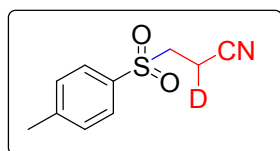

**D-3aa**, 3-tosylpropanenitrile

4-methylbenzenesulfo hydrazide (0.5mmol, 96.1 mg), acrylonitrile (1mmol, 0.065 mL) and D<sub>2</sub>O (1 mL) were added in a thick-walled pressure tube. The resultant mixture was stirred at 80 °C under magnetic stirring for 10 h. After the reaction was completed, the reaction solution was cooled to room temperature. The mixture was

extracted with EtOAc (2 × 50 mL) and then the combined organic extracts were washed with brine for three times (3 × 10 mL), dried over sodium sulfate, and filtered. The solvent was removed under reduced pressure and the residue was purified by column chromatography (EtOAc: petroleum ether =1: 2) a light white solid (98.8 mg, yield of 94%). <sup>1</sup>HNMR (400 MHz, CDCl<sub>3</sub>) δ 7.81 (d, *J* = 8.3 Hz, 2H), 7.43 (d, *J* = 8.0 Hz, 2H), 3.37-3.35 (m, 2H), 2.80-2.72 (m, 1H), 2.47 (s, 3H). LCMS: calcd for C<sub>10</sub>H<sub>10</sub>DNO<sub>2</sub>S: 210.0, found 210.0+23=233.1.

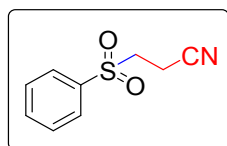

**3ba**, 3-(phenylsulfonyl)propanenitrile <sup>lit.</sup> (2)

Benzenesulfonylhydrazine (1 mmol, 172.2 mg), acrylonitrile (2 mmol, 0.13 mL) and water (2 mL) were added in a thick-walled pressure tube. The resultant mixture was stirred at 80 °C under magnetic stirring for 10 h. After the reaction was completed, the reaction solution was cooled to room temperature. The mixture was extracted with EtOAc (2 × 50 mL) and then the combined organic extracts were washed with brine for three times (3 × 10 mL), dried over sodium sulfate, and filtered. The solvent was removed under reduced pressure and the residue was purified by column chromatography (EtOAc: petroleum ether =1: 2) a light white solid (175.7 mg, yield of 94%). <sup>1</sup>HNMR (400 MHz, CDCl<sub>3</sub>) δ 7.93 (d, *J* = 7.3 Hz, 2H), 7.74 (t, *J* = 7.5 Hz, 1H), 7.63 (t, *J* = 7.7 Hz, 2H), 3.46-3.32 (m, 2H), 2.82 (t, *J* = 7.7 Hz, 2H). <sup>13</sup>CNMR (100 MHz, CDCl<sub>3</sub>) δ 137.5, 130.1, 128.2, 116.2, 51.2, 29.5, 12.1. Anal. Calcd for C<sub>9</sub>H<sub>9</sub>NO<sub>2</sub>S: C, 55.36; H, 4.69; N, 7.18; S, 16.42. Found: C, 55.29; H, 4.57; N, 7.19; S, 16.30. IR (liquid film, cm<sup>-1</sup>): ν=3411, 2841, 2242, 1581, 1152, 1303. HRMS (TOF-HRMS-EI): calcd for C<sub>9</sub>H<sub>9</sub>NO<sub>2</sub>S 195.0355, found 195.0348.

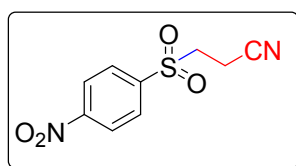

**3ca**, 3-((4-nitrophenyl)sulfonyl)propanenitrile <sup>lit.</sup> (3)

4-nitrobenzenesulfonyl hydrazine (1 mmol, 217.2 mg), acrylonitrile (2 mmol, 0.13 mL) and water (2 mL) were added in a thick-walled pressure tube. The resultant mixture was stirred at 80 °C under magnetic stirring for 10 h. After the reaction was completed, the reaction solution was cooled to room temperature. The mixture was extracted with EtOAc (2 × 50 mL) and then the combined organic extracts were washed with brine for three times (3 × 10 mL), dried over sodium sulfate, and filtered. The solvent was removed under reduced pressure and the residue was purified by

column chromatography (EtOAc: petroleum ether =1: 2) a light white solid (216.2 mg, yield of 93%).  $^1\text{H}$ NMR (400 MHz,  $\text{CDCl}_3$ )  $\delta$  8.50 (d,  $J$  = 8.9 Hz, 2H), 8.19 (d,  $J$  = 8.9 Hz, 2H), 3.48 (t,  $J$  = 7.4 Hz, 2H), 2.92 (t,  $J$  = 7.4 Hz, 2H).  $^{13}\text{C}$ NMR (101 MHz,  $\text{CDCl}_3$ )  $\delta$  151.4, 143.1, 129.8, 124.9, 115.3, 51.0, 29.8 11.9. Anal. Calcd. for  $\text{C}_9\text{H}_8\text{N}_2\text{O}_4\text{S}$ : C, 45.09; H, 3.37; N, 11.67; S, 13.35. Found: C, 39.90; H, 3.26; N, 11.59; S, 13.30. IR (liquidfilm,  $\text{cm}^{-1}$ ):  $\nu$ =3419, 2831, 2254, 1538, 1151, 1306. HRMS (TOF-HRMS-EI): calcd for  $\text{C}_9\text{H}_8\text{N}_2\text{O}_4\text{S}$  240.2327, found 240.2331.

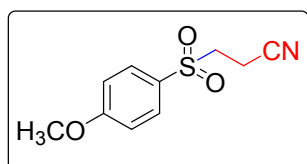

**3da**, 3-((4-methoxyphenyl)sulfonyl)propanenitrile

4-methoxy benzenesulfonylhydrazine (0.5 mmol, 101.1 mg), acrylonitrile (1 mmol, 0.065 mL) and water (1 mL) were added in a thick-walled pressure tube. The resultant mixture was stirred at 80 °C under magnetic stirring for 10 h. After the reaction was completed, the reaction solution was cooled to room temperature. The mixture was extracted with EtOAc (2 × 50 mL) and then the combined organic extracts were washed with brine for three times (3 × 10 mL), dried over sodium sulfate, and filtered. The solvent was removed under reduced pressure and the residue was purified by column chromatography (EtOAc: petroleum ether =1: 2) a light white solid (219.8 mg, yield of 97%).  $^1\text{H}$ NMR (400 MHz,  $\text{CDCl}_3$ )  $\delta$  7.85 (d,  $J$  = 9.0 Hz, 2H), 7.06 (d,  $J$  = 9.0 Hz, 2H), 3.90 (s, 3H), 3.46-3.26 (m, 2H), 2.90-2.71 (m, 2H).  $^{13}\text{C}$ NMR (100MHz,  $\text{CDCl}_3$ )  $\delta$  164.4, 130.4, 128.8, 116.0, 114.9, 55.7, 51.3, 12.0. Anal. Calcd. for  $\text{C}_{10}\text{H}_{11}\text{NO}_3\text{S}$ : C, 53.32; H, 4.92; N, 6.22; S, 14.23. Found: C, 53.21; H, 4.80; N, 6.13; S, 14.10. IR (liquid film,  $\text{cm}^{-1}$ ):  $\nu$ =3430, 2845, 2247, 1573, 2841, 1143, 1300. HRMS (TOF-HRMS-EI): calcd for  $\text{C}_{10}\text{H}_{11}\text{NO}_3\text{S}$  225.0455, found 225.0458.

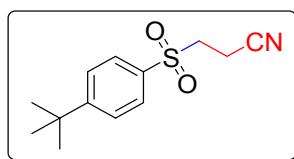

**3ea**, 3-((4-(tert-butyl)phenyl)sulfonyl)propanenitrile

4-tertbutyl benzene sulfonyl hydrazide (2 mmol, 456.6 mg), acrylonitrile (4 mmol, 0.26 mL) and water (4 mL) were added in a thick-walled pressure tube. The resultant mixture was stirred at 80 °C under magnetic stirring for 10 h. After the reaction was completed, the reaction solution was cooled to room temperature. The mixture was extracted with EtOAc (2 × 50 mL) and then the combined organic extracts were washed with brine for three times (3 × 10 mL), dried over sodium sulfate, and filtered. The solvent was removed under reduced pressure and the residue was purified by



column chromatography (EtOAc: petroleum ether =1: 2) a light white solid (480 mg, yield of 96%).  $^1\text{H}$  NMR (400 MHz,  $\text{CDCl}_3$ )  $\delta$  7.86 (d,  $J$  = 8.7 Hz, 2H), 7.64 (d,  $J$  = 8.7 Hz, 2H), 3.72-3.20 (m, 2H), 3.04-2.74 (m, 2H), 1.38 (s, 9H).  $^{13}\text{C}$  NMR (100 MHz,  $\text{CDCl}_3$ )  $\delta$  158.8, 134.3, 128.1, 126.7, 116.0, 51.0, 35.3, 30.9, 11.9. Anal. Calcd for  $\text{C}_{13}\text{H}_{17}\text{NO}_2\text{S}$ : C, 62.12; H, 6.82; N, 5.47; S, 12.66. Found: C, 61.98; H, 6.76; N, 5.29; S, 12.58. IR (liquid film,  $\text{cm}^{-1}$ ):  $\nu$ =3406, 2837, 2249, 1544, 1448, 1507, 1138, 1311. HRMS (TOF-HRMS-EI): calcd. for  $\text{C}_{13}\text{H}_{17}\text{NO}_2\text{S}$  251.0977, found 251.0970.

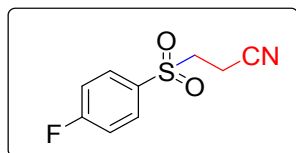

**3fa**, 3-((4-fluorophenyl)sulfonyl)propanenitrile <sup>lit. (4)</sup>

4-monofluoro benzenesulfonylhydrazine (0.5 mmol, 92.2 mg), acrylonitrile (1.5 mmol, 0.19 mL) and water (1 mL) were added in a thick-walled pressure tube. The resultant mixture was stirred at 80 °C under magnetic stirring for 10 h. After the reaction was completed, the reaction solution was cooled to room temperature. The mixture was extracted with EtOAc (2 × 50 mL) and then the combined organic extracts were washed with brine for three times (3 × 10 mL), dried over sodium sulfate, and filtered. The solvent was removed under reduced pressure and the residue was purified by column chromatography (EtOAc: petroleum ether =1: 2) a light white solid (102.3 mg, yield of 92%).  $^1\text{H}$  NMR (400 MHz,  $\text{CDCl}_3$ )  $\delta$  7.97 (dd,  $J$  = 8.9, 5.0 Hz, 2H), 7.36-7.28 (m, 2H), 3.39 (t,  $J$  = 7.6 Hz, 2H), 2.84 (t,  $J$  = 7.6 Hz, 2H).  $^{13}\text{C}$  NMR (101 MHz,  $\text{CDCl}_3$ )  $\delta$  167.6, 165.1, 133.6, 131.2, 117.2, 117.0, 115.8, 51.3, 11.9. Anal. Calcd for  $\text{C}_9\text{H}_8\text{FNO}_2\text{S}$ : C, 50.56; H, 3.68; F, 8.91; N, 6.57; S, 15.04. Found: C, 50.27; H, 3.50; F, 8.89; N, 6.43; S, 15.00. IR (liquid film,  $\text{cm}^{-1}$ ):  $\nu$ =3390, 2874, 2250, 1599, 1224, 1133, 1301. HRMS (TOF-HRMS-EI): calcd. for  $\text{C}_9\text{H}_8\text{FNO}_2\text{S}$  240.2327, found 240.2331.

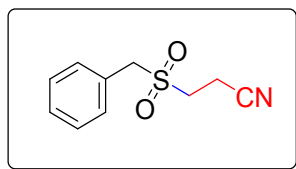

**3ga**, 3-(benzylsulfonyl)propanenitrile

Benzyl benzenesulfonylhydrazine (1 mmol, 262.2 mg), acrylonitrile (2 mmol, 0.13 mL) and water (2 mL) were added in a thick-walled pressure tube. The resultant mixture was stirred at 80 °C under magnetic stirring for 10 h. After the reaction was completed, the reaction solution was cooled to room temperature. The mixture was extracted with EtOAc (2 × 50 mL) and then the combined organic extracts were washed with brine for three times (3 × 10 mL), dried over sodium sulfate, and filtered.

The solvent was removed under reduced pressure and the residue was purified by column chromatography (EtOAc: petroleum ether =1: 2) a light white solid (256.2 mg, yield of 93%). <sup>1</sup>HNMR (400 MHz, DMSO)  $\delta$  7.41 (s, 5H), 4.58 (s, 2H), 3.45 (d,  $J$  = 7.1 Hz, 2H), 2.98 (t,  $J$  = 7.1 Hz, 2H). <sup>13</sup>CNMR (100 MHz, DMSO)  $\delta$  131.5, 129.1, 128.3, 118.7, 58.2, 46.7, 11.0. Anal. Calcd for C<sub>9</sub>H<sub>9</sub>NO<sub>2</sub>S: C, 57.37; H, 5.25; N, 6.61; S, 15.23. Found: C, 57.11; H, 5.13 N, 6.57; S, 15.14. IR (liquid film, cm<sup>-1</sup>):  $\nu$ =3423, 2847, 2249, 1587, 1150, 1307. HRMS (TOF-HRMS-EI): calcd for C<sub>9</sub>H<sub>9</sub>NO<sub>2</sub>S 240.2327, found 240.2331.

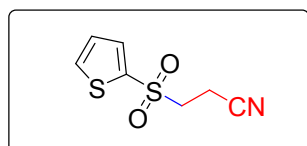

**3ha**, 3-(thiophen-2-ylsulfonyl)propanenitrile

2-thiophene sulfonyl hydrazine (1 mmol, 206.5 mg), acrylonitrile (2 mmol, 0.13 mL) and water (2 mL) were added in a thick-walled glass tube. The resultant mixture was stirred at 80 °C under magnetic stirring for 10 h. After the reaction was completed, the reaction solution was cooled to room temperature. The mixture was extracted with EtOAc (2  $\times$  50 mL) and then the combined organic extracts were washed with brine for three times (3  $\times$  10 mL), dried over sodium sulfate, and filtered. The solvent was removed under reduced pressure and the residue was purified by column chromatography (EtOAc: petroleum ether =1: 2) a light white solid (192.5 mg, yield of 94%). <sup>1</sup>HNMR (400 MHz, DMSO)  $\delta$  8.05 (dd,  $J$  = 5.0, 1.3 Hz, 1H), 7.74 (dd,  $J$  = 3.8, 1.3 Hz, 1H), 7.21 (dd,  $J$  = 4.9, 3.8 Hz, 1H), 3.68 (t,  $J$  = 6.8 Hz, 2H), 2.79 (t,  $J$  = 6.8 Hz, 2H). <sup>13</sup>CNMR (101 MHz, DMSO)  $\delta$  138.4, 136.3, 135.4, 129.0, 117.7, 51.4, 12.0. Anal. Calcd for C<sub>7</sub>H<sub>7</sub>NO<sub>2</sub>S<sub>2</sub>: C, 41.59; H, 3.35; N, 6.87; S, 31.76. Found: C, 41.34; H, 3.13; N, 6.80; S, 31.65. IR (liquid film, cm<sup>-1</sup>):  $\nu$ =3098, 1531, 2849, 2252, 1137, 1309. HRMS (TOF-HRMS-EI): calcd for C<sub>7</sub>H<sub>7</sub>NO<sub>2</sub>S<sub>2</sub> 200.9919, found 200.9923.

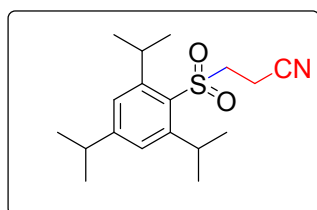

**3ia**, 3-((2,4,6-triisopropylphenyl)sulfonyl)propanenitrile

2, 4, 6-three isopropyl benzenesulfonylhydrazide (1 mmol, 321.4 mg), acrylonitrile (2 mmol, 0.13 mL) and water (2 mL) were added in a thick-walled glass tube. The resultant mixture was stirred at 80 °C under magnetic stirring for 10 h. After the reaction was completed, the reaction solution was cooled to room temperature. The mixture was extracted with EtOAc (2  $\times$  50 mL) and then the combined organic

extracts were washed with brine for three times ( $3 \times 10$  mL), dried over sodium sulfate, and filtered. The solvent was removed under reduced pressure and the residue was purified by column chromatography (EtOAc: petroleum ether =1: 2) a light white solid (192.5 mg, yield of 93%).  $^1\text{H}$ NMR (400 MHz,  $\text{CD}_3\text{OD}$ )  $\delta$  7.10 (s, 2H), 4.47 (dt,  $J$  = 13.6, 6.8 Hz, 2H), 3.58 (dt,  $J$  = 13.6, 6.9 Hz, 2H), 3.08-2.74 (m, 3H), 1.24-1.21 (m, 18H).  $^{13}\text{C}$ NMR (101 MHz,  $\text{CD}_3\text{OD}$ )  $\delta$  151.1, 147.5, 137.9, 123.7, 121.6, 51.9, 33.4, 28.5, 23.3, 22.3, 10.12. Anal. Calcd for  $\text{C}_{18}\text{H}_{27}\text{NO}_2\text{S}$ : C, 67.05; H, 8.58; N, 4.33; S, 9.91. Found: C, 66.78; H, 8.39; N, 4.29; S, 8.89. HRMS (TOF-HRMS-EI): calcd for  $\text{C}_{18}\text{H}_{27}\text{NO}_2\text{S}$  321.1753, found 321.1761.

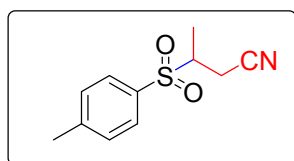

**3ab**, 3-tosylbutanenitrile

4-methoxybenzenesulfonylhydrazine (1 mmol, 186.2 mg), 2-butenenitrile (2.5 mmol, 0.2 mL) and water (2 mL) were added in a thick-walled pressure tube. The resultant mixture was stirred at 120 °C under magnetic stirring for 10 h. After the reaction was completed, the reaction solution was cooled to room temperature. The mixture was extracted with EtOAc ( $2 \times 50$  mL) and then the combined organic extracts were washed with brine for three times ( $3 \times 10$  mL), dried over sodium sulfate, and filtered. The solvent was removed under reduced pressure and the residue was purified by column chromatography (EtOAc: petroleum ether =1: 2) a light white solid (136.2 mg, yield of 85%).  $^1\text{H}$ NMR (400 MHz,  $\text{CDCl}_3$ )  $\delta$  7.76 (d,  $J$  = 8.3 Hz, 2H), 7.38 (d,  $J$  = 8.0 Hz, 2H), 3.30-3.36 (m, 1H), 2.92 (t, 1H), 2.60 (t, 1H), 2.41 (s, 3H), 1.43 (d, 3H).  $^{13}\text{C}$ NMR (101 MHz,  $\text{CDCl}_3$ )  $\delta$  145.9, 132.68, 130.26, 129.1, 115.8, 56.0, 21.7, 18.9, 13.5. Anal. Calcd for  $\text{C}_{11}\text{H}_{13}\text{NO}_2\text{S}$ : C, 59.07; H, 5.56; N, 6.19; S, 14.34. Found: C, 58.87; H, 5.40; N, 6.10; S, 14.26. IR (liquid film,  $\text{cm}^{-1}$ ):  $\nu$  = 3438, 3195, 2368, 1161, 1369, 960, 692. HRMS (TOF-HRMS-EI): calcd for  $\text{C}_{11}\text{H}_{13}\text{NO}_2\text{S}$  223.0667, found 223.0599.

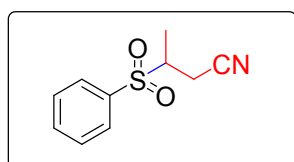

**3bb**, 3-(phenylsulfonyl)butanenitrile <sup>lit. (5)</sup>

Benzenesulfonylhydrazide (1 mmol, 171.2 mg), 2-butenenitrile (2.5 mmol, 0.2 mL) and water (2 mL) were added in a thick-walled pressure tube. The resultant mixture was stirred at 120 °C under magnetic stirring for 10 h. After the reaction was

completed, the reaction solution was cooled to room temperature. The mixture was extracted with EtOAc (2 × 50 mL) and then the combined organic extracts were washed with brine for three times (3 × 10 mL), dried over sodium sulfate, and filtered. The solvent was removed under reduced pressure and the residue was purified by column chromatography (EtOAc: petroleum ether = 1: 2) a light white solid (154.6 mg, yield of 85%). <sup>1</sup>HNMR (400 MHz, CDCl<sub>3</sub>) δ 7.88-7.90 (m, 2H), 7.72-7.76 (m, 1H), 7.61-7.65 (m, 2H), 3.32-3.41 (m, 1H), 2.95-3.01 (dd, *J* = 16.9, 4.3 Hz, 1H), 2.61-2.67 (dd, *J* = 16.9, 9.9 Hz, 1H), 1.46 (d, *J* = 6.9 Hz, 3H). <sup>13</sup>CNMR (101 MHz, CDCl<sub>3</sub>) δ, 134.7, 129.6, 129.1, 115.8, 55.9, 29.7, 18.8, 13.5. IR (liquid film, cm<sup>-1</sup>): ν=3431, 2950, 2243, 1274, 1008, 702. Anal. Calcd for C<sub>10</sub>H<sub>11</sub>NO<sub>2</sub>S: C, 57.40; H, 5.25; N, 6.57; S, 15.19. Found: C, 57.18; H, 5.10; N, 6.51; S, 15.09. HRMS (TOF-HRMS-EI): calcd for C<sub>10</sub>H<sub>11</sub>NO<sub>2</sub>S 209.0535, found 209.0549.

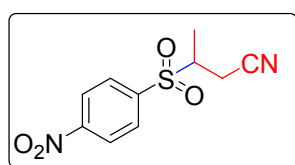

**3cb**, 3-((4-nitrophenyl)sulfonyl)butanenitrile

4-nitrobenzenesulfonylhydrazide (1 mmol, 217.2 mg), 2-butenitrile (2.5 mmol, 0.2 mL) and water (2 mL) were added in a thick-walled pressure tube. The resultant mixture was stirred at 120 °C under magnetic stirring for 10 h. After the reaction was completed, the reaction solution was cooled to room temperature. The mixture was extracted with EtOAc (2 × 50 mL) and then the combined organic extracts were washed with brine for three times (3 × 10 mL), dried over sodium sulfate, and filtered. The solvent was removed under reduced pressure and the residue was purified by column chromatography (EtOAc: petroleum ether = 1: 2) a light white solid (179.7 mg, yield of 80%). <sup>1</sup>HNMR (400 MHz, CDCl<sub>3</sub>) δ 7.76 (d, *J* = 8.3 Hz, 2H), 7.41 (d, *J* = 8.0 Hz, 2H), 3.33 (m, *J* = 13.9, 6.9, 4.2 Hz, 1H), 2.97 (dd, *J* = 16.9, 4.2 Hz, 1H), 2.62 (dd, *J* = 16.9, 10.1 Hz, 1H), 1.46 (d, *J* = 6.9 Hz, 3H). <sup>13</sup>CNMR (101 MHz, CDCl<sub>3</sub>) δ 151.5, 141.6, 130.6, 124.55, 115.26, 56.1, 18.4, 13.74. IR (liquid film, cm<sup>-1</sup>): ν= 3423, 2832, 2255, 1536, 1525, 1150, 1309. Anal. Calcd for C<sub>10</sub>H<sub>10</sub>N<sub>2</sub>O<sub>4</sub>S: C, 47.24; H, 3.76; N, 11.12; S, 12.61. Found: C, 47.02; H, 3.51; N, 11.04; S, 12.43. HRMS (TOF-HRMS-EI): calcd for C<sub>10</sub>H<sub>10</sub>N<sub>2</sub>O<sub>4</sub>S 254.0355, found 254.0349.

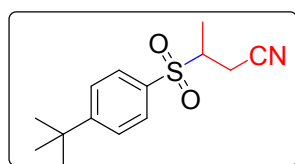

**3ed**, 3-((4-(tert-butyl)phenyl)sulfonyl)butanenitrile

4-tertbutyl benzene sulfonyl hydrazide (1 mmol, 228.3 mg), 2-butenenitrile (2.5 mmol, 0.2 mL) and water (4 mL) were added in a thick-walled pressure tube. The resultant mixture was stirred at 120 °C under magnetic stirring for 10 h. After the reaction was completed, the reaction solution was cooled to room temperature. The mixture was extracted with EtOAc (2 × 50 mL) and then the combined organic extracts were washed with brine for three times (3 × 10 mL), dried over sodium sulfate, and filtered. The solvent was removed under reduced pressure and the residue was purified by column chromatography (EtOAc: petroleum ether =1: 2) a light white solid (177 mg, yield of 89%). <sup>1</sup>HNMR (400 MHz, CDCl<sub>3</sub>) δ 7.79 (d, *J* = 8.6 Hz, 2H), 7.61 (d, *J* = 8.6 Hz, 2H), 3.47-3.19 (m, 1H), 2.97 (dd, *J* = 16.9, 4.1 Hz, 1H), 2.61 (dd, *J* = 16.9, 10.1 Hz, 1H), 1.46 (d, *J* = 6.9 Hz, 3H), 1.35 (s, 9H). <sup>13</sup>CNMR (101 MHz, CDCl<sub>3</sub>) δ 159.4, 132.8, 129.27, 126.9, 116.1, 56.2, 36.3, 31.0, 18.9, 13.6. Anal. Calcd for C<sub>14</sub>H<sub>19</sub>NO<sub>2</sub>S: C, 63.23; H, 7.02; N, 5.19; S, 12.04. Found: C, 63.09; H, 6.89; N, 5.08; S, 11.88. HRMS (TOF-HRMS-EI): calcd for C<sub>14</sub>H<sub>19</sub>NO<sub>2</sub>S 265.1136, found 266.1170.

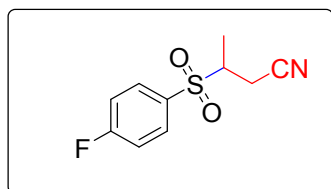

**3fb**, 3-((4-fluorophenyl)sulfonyl)butanenitrile

4-monofluoro benzenesulfonylhydrazine (1 mmol, 185.8 mg), 2-butenenitrile (2.5 mmol, 0.2 mL) and water (2 mL) were added in a thick-walled pressure tube. The resultant mixture was stirred at 120 °C under magnetic stirring for 10 h. After the reaction was completed, the reaction solution was cooled to room temperature. The mixture was extracted with EtOAc (2 × 50 mL) and then the combined organic extracts were washed with brine for three times (3 × 10 mL), dried over sodium sulfate, and filtered. The solvent was removed under reduced pressure and the residue was purified by column chromatography (EtOAc: petroleum ether =1: 2) a light white solid (156.8 mg, yield of 75%). <sup>1</sup>HNMR (400 MHz, CDCl<sub>3</sub>) δ 7.80 (d, *J* = 8.3 Hz, 2H), 7.42 (d, *J* = 8.0 Hz, 2H), 3.36 (d, *J* = 7.7 Hz, 2H), 2.76-2.81 (m, 1H), 2.48 (s, 3H). <sup>13</sup>CNMR (101 MHz, CDCl<sub>3</sub>) δ 145.9, 132.68, 130.26, 129.1, 115.8, 56.0, 21.7, 18.9, 13.5. IR (liquid film, cm<sup>-1</sup>): ν=3558, 3419, 2939, 2252, 1593, 1151, 582. Anal. Calcd for C<sub>10</sub>H<sub>10</sub>FNO<sub>2</sub>S: C, 52.75; H, 4.54; F, 8.29; N, 6.06; S, 14.11. Found: C, 52.57; H, 4.32; F, 8.18; N, 6.01; S, 14.04. HRMS (TOF-HRMS-EI): calcd for C<sub>10</sub>H<sub>10</sub>FNO<sub>2</sub>S 227.0433, found 227.0426.

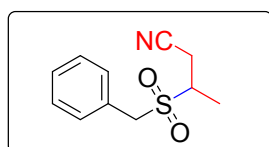

**3gb**, 3-(benzylsulfonyl)butanenitrile

Phenylmethanesulfonylhydrazide (1 mmol, 186.2 mg), 2-butenenitrile (2.5 mmol, 0.2 mL) and water (4 mL) were added in a thick-walled pressure tube. The resultant mixture was stirred at 120 °C under magnetic stirring for 10 h. After the reaction was completed, the reaction solution was cooled to room temperature. The mixture was extracted with EtOAc (2 × 50 mL) and then the combined organic extracts were washed with brine for three times (3 × 10 mL), dried over sodium sulfate, and filtered. The solvent was removed under reduced pressure and the residue was purified by column chromatography (EtOAc: petroleum ether = 1: 2) a light white solid (158.5 mg, yield of 87%). <sup>1</sup>HNMR (400 MHz, CDCl<sub>3</sub>) δ 7.42 (s, 5H), 4.32 (s, 2H), 3.32-3.06 (m, 1H), 2.89 (dd, *J* = 17.1, 4.7 Hz, 1H), 2.63 (dd, *J* = 17.1, 9.3 Hz, 1H), 1.54 (d, *J* = 6.9 Hz, 3H). <sup>13</sup>CNMR (101 MHz, CDCl<sub>3</sub>) δ 130.9, 129.7, 129.6, 127.0, 116.4, 57.8, 52.0, 18.5, 13.96. Anal. Calcd for C<sub>11</sub>H<sub>13</sub>NO<sub>2</sub>S: C, 58.87; H, 5.60; N, 6.27; S, 14.36. Found: C, 58.50; H, 5.45; N, 6.21; S, 14.24. HRMS (TOF-HRMS-EI): calcd for C<sub>11</sub>H<sub>13</sub>NO<sub>2</sub>S 223.0666, found 223.0716.

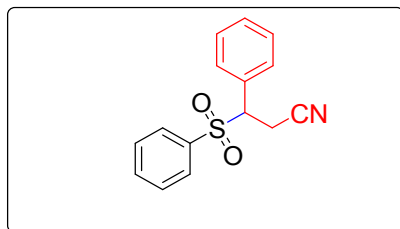

**3bc**, 3-phenyl-3-(phenylsulfonyl)propanenitrile

Benzenesulfonylhydrazine (1 mmol, 276.8 mg), cinnamonnitrile (1.5 mmol, 0.2 mL) and water (2 mL) were added in a thick-walled pressure tube. The resultant mixture was stirred at 130 °C under magnetic stirring for 10 h. After the reaction was completed, the reaction solution was cooled to room temperature. The mixture was extracted with EtOAc (2 × 50 mL) and then the combined organic extracts were washed with brine for three times (3 × 10 mL), dried over sodium sulfate, and filtered. The solvent was removed under reduced pressure and the residue was purified by column chromatography (EtOAc: petroleum ether = 1: 2) a light white solid (138.4 mg, yield of 50%). <sup>1</sup>HNMR (400 MHz, CDCl<sub>3</sub>) δ 8.05-7.85 (m, 3H), 7.74 (d, *J* = 7.2 Hz, 1H), 7.69 -7.56 (m, 2H), 7.53 (t, *J* = 7.4 Hz, 2H), 7.47-7.28 (m, 2H), 4.93 (s, 2H), 3.64 (dt, *J* = 13.2, 6.6 Hz, 1H). <sup>13</sup>CNMR (101 MHz, CDCl<sub>3</sub>) δ 142.1, 133.0, 129.3, 128.9, 126.5, 125.8, 58.1, 55.7, 29.8. IR (liquid film, cm<sup>-1</sup>): ν=3429, 2892, 2159, 1543, 1126, 710. Anal. Calcd for C<sub>15</sub>H<sub>13</sub>NO<sub>2</sub>S: C, 66.28; H, 4.43; N, 5.06; S, 11.80. Found: C, 66.00; H, 4.21; N, 4.09; S, 11.69. HRMS (TOF-HRMS-EI): calcd for C<sub>15</sub>H<sub>13</sub>NO<sub>2</sub>S 271.0657, found 271.0649.

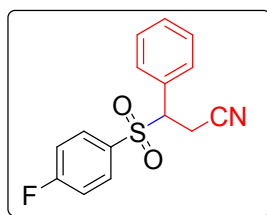

**3fc**, 3-((4-fluorophenyl)sulfonyl)-3-phenylpropanenitrile

4-monofluoro benzenesulfonylhydrazine (1 mmol, 294.6 mg), cinnamionitrile (1.5 mmol, 0.2 mL) and water (2 mL) were added in a thick-walled pressure tube. The resultant mixture was stirred at 130 °C under magnetic stirring for 10 h. After the reaction was completed, the reaction solution was cooled to room temperature. The mixture was extracted with EtOAc (2 × 50 mL) and then the combined organic extracts were washed with brine for three times (3 × 10 mL), dried over sodium sulfate, and filtered. The solvent was removed under reduced pressure and the residue was purified by column chromatography (EtOAc: petroleum ether =1: 2) a light white solid (153.7 mg, yield of 43%). <sup>1</sup>HNMR (400 MHz, CDCl<sub>3</sub>) δ 8.06-7.83 (m, 2H), 7.75 (d, *J* = 7.1 Hz, 2H), 7.53 (dd, *J* = 17.3, 9.4 Hz, 1H), 7.43 (dd, *J* = 12.9, 5.3 Hz, 2H), 7.36 (d, *J* = 6.2 Hz, 1H), 7.24- 7.13 (m, 1H), 4.93 (s, 1H), 2.78 (s, 1H), 2.12 (s, 1H). <sup>13</sup>CNMR (101 MHz, CDCl<sub>3</sub>) δ143.9, 138.9, 129.8, 129.0, 128.9, 128.3, 126.6, 125.8, 125.6, 115.2, 70.4, 32.0, 14.2. Anal. Calcd for C<sub>15</sub>H<sub>12</sub>FNO<sub>2</sub>S: C, 62.24; H, 3.96; F, 6.56; N, 4.74; S, 11.18. Found: C, 62.02; H, 3.67; F, 6.49; N, 4.58; S, 11.02. IR (liquid film, cm<sup>-1</sup>): ν=3421, 2898, 2238, 1601, 1243, 692. HRMS (TOF-HRMS-EI): calcd for C<sub>15</sub>H<sub>12</sub>FNO<sub>2</sub>S 289.0572, found 289.0571.

#### References for the 3-sulfone nitrile:

- (1) **3aa**: C. D. Hurd, L. L. Gershbein, *J. Am. Chem. Soc.*, 1947, **69**, P2328.
- (2) **3ba**: J. Y. Lee, Y. T. Hong, S. Sunggak, *Angew. Chem. Int. Edit.*, 2006, **45**, 6182.
- (3) **3ca**: I. K. Fel'dman, V. N. Mikhailova, *Zhurnal Obshchei Khimii*, 1961, **31**, 2115.
- (4) **3fa**: Spectral data were obtained from Wiley Subscription Services, Inc. (US).
- (5) **3bb**: R. M. Ross, *J. Am. Chem. Soc.*, 1949, **71**, 3458.

**1a** 4-methylbenzenesulfonohydrazide

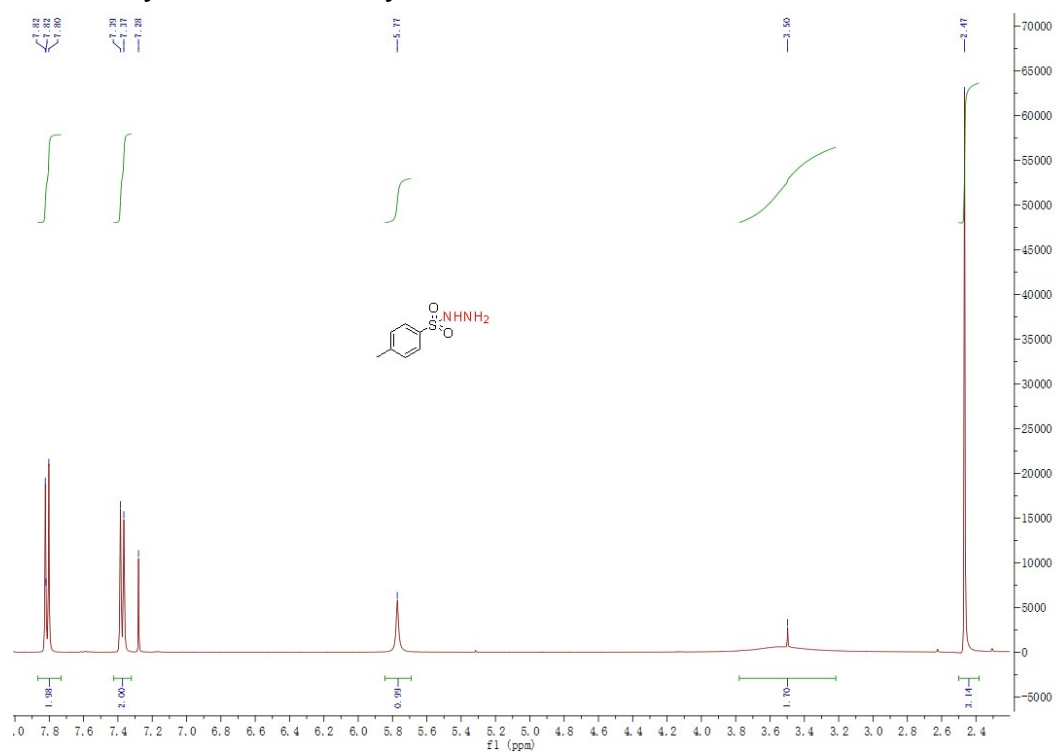



# **3aa** 3-tosylpropanenitrile

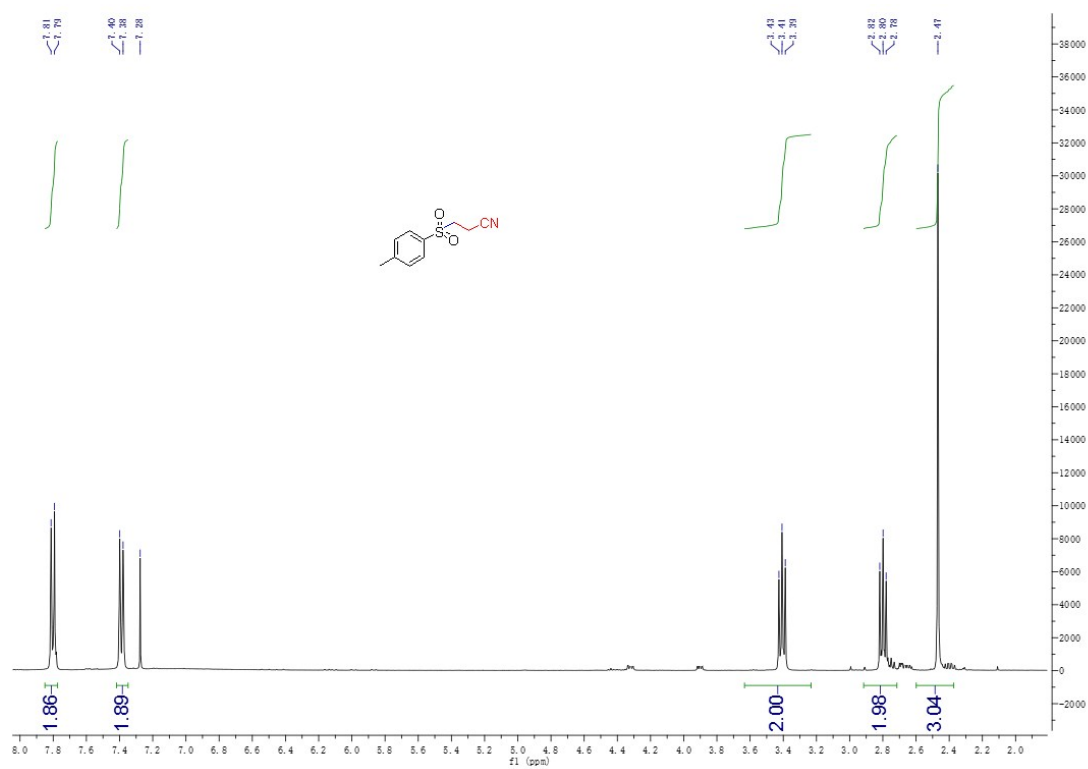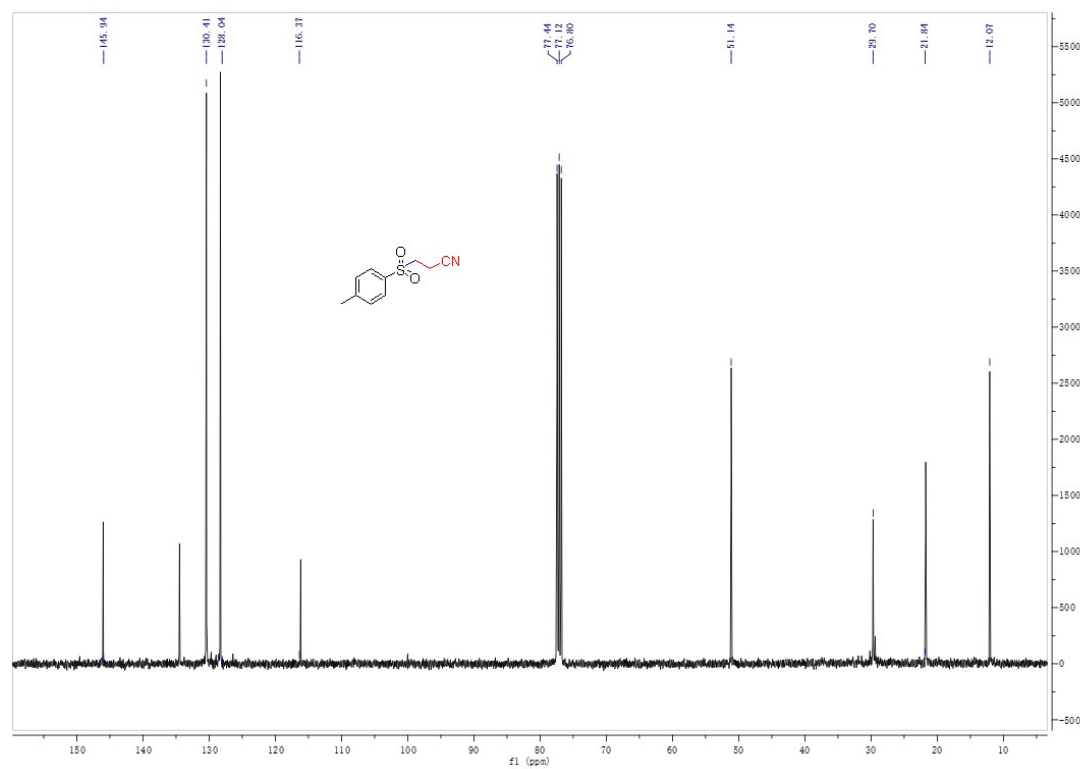

**D-3aa** 3-tosylpropanenitrile

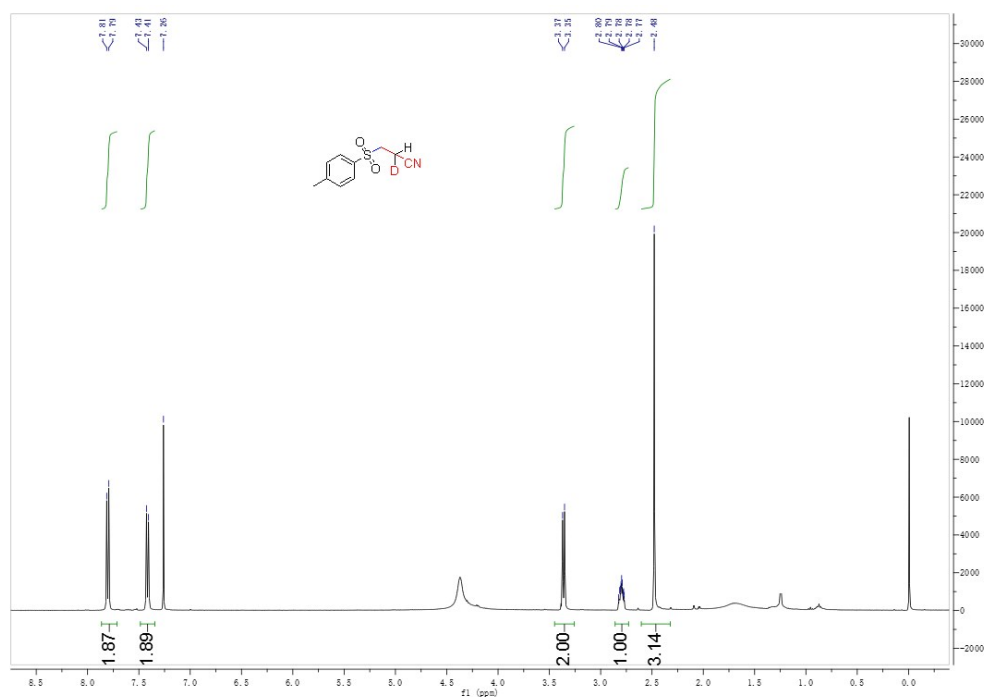

**3ba** 3-(phenylsulfonyl)propanenitrile

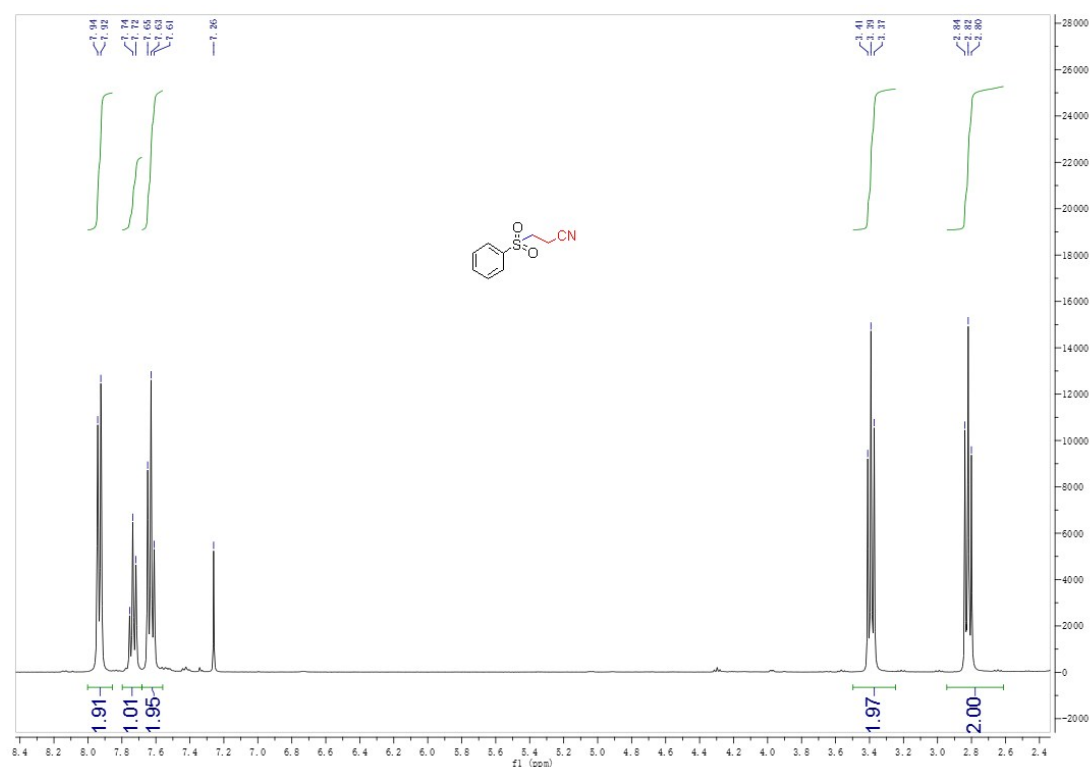

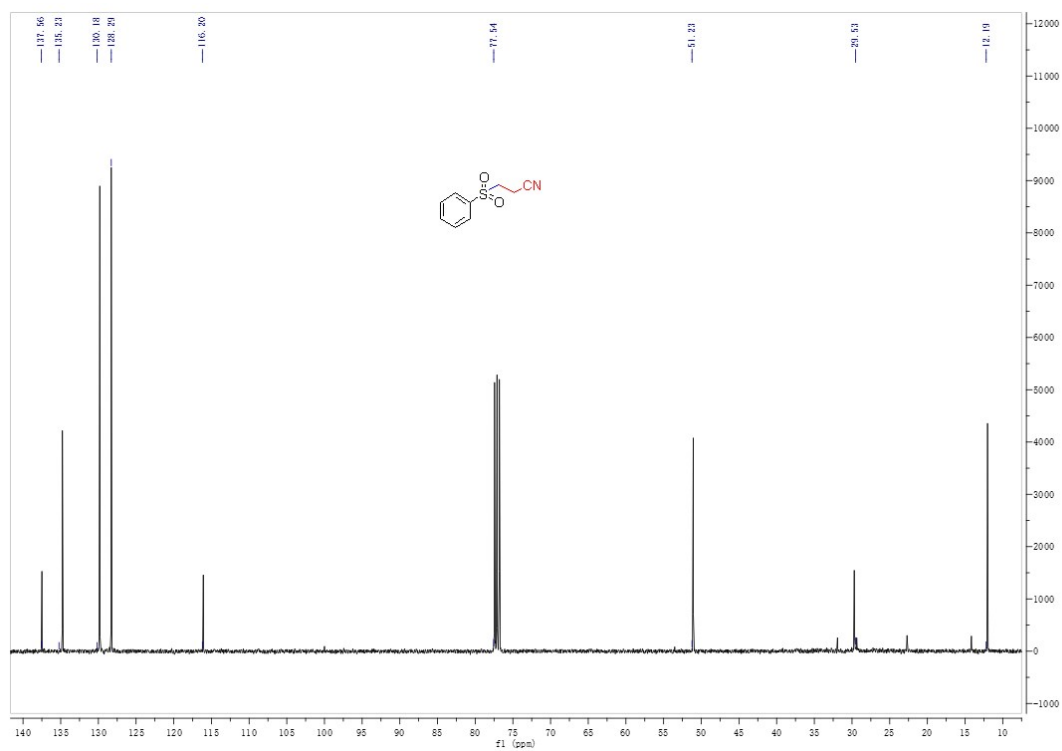

**3ca** 3-((4-nitrophenyl)sulfonyl)propanenitrile

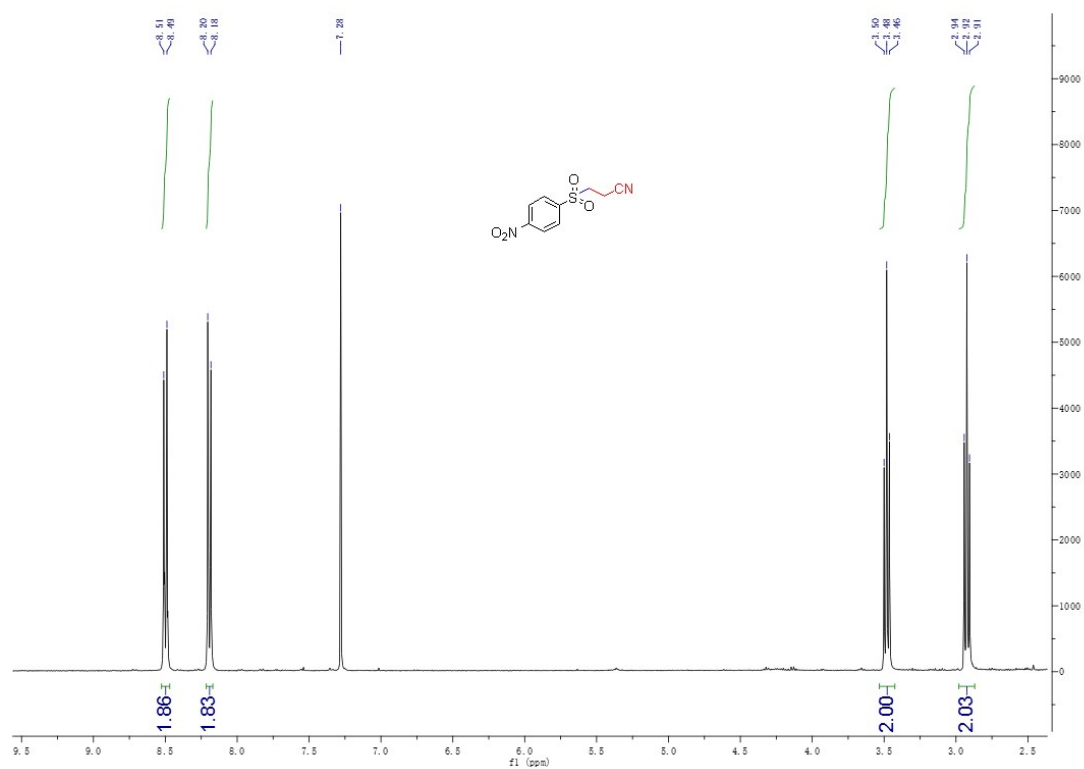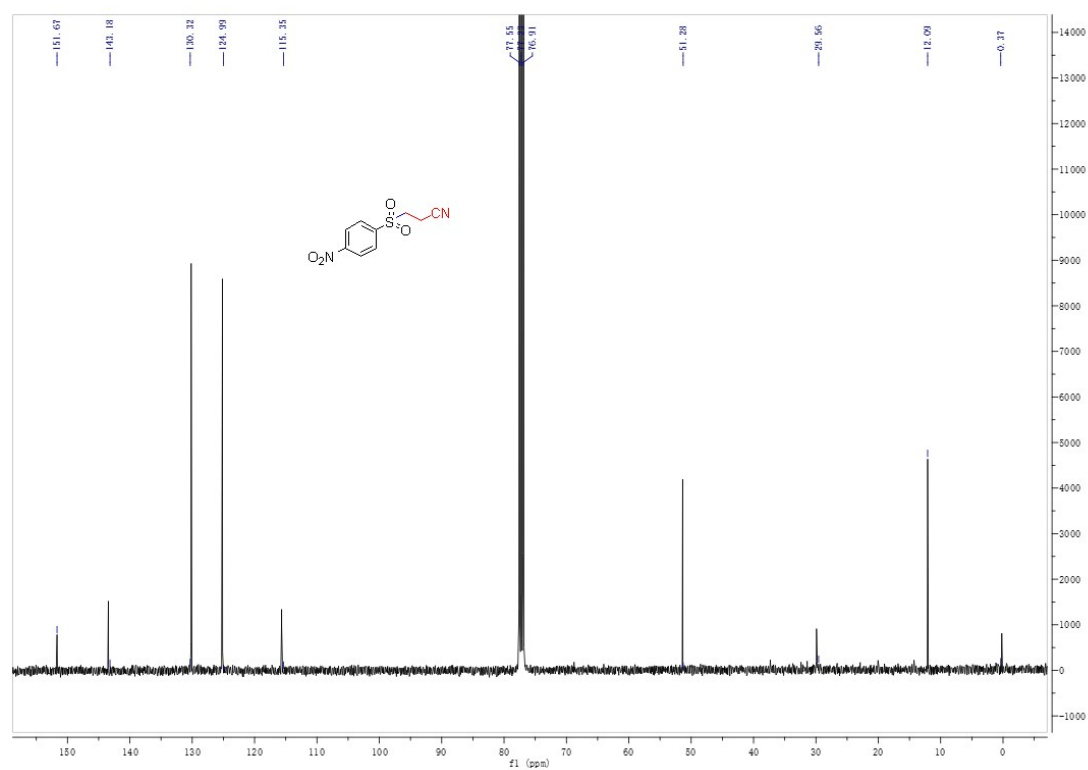

**3da** 3-((4-methoxyphenyl)sulfonyl)propanenitrile

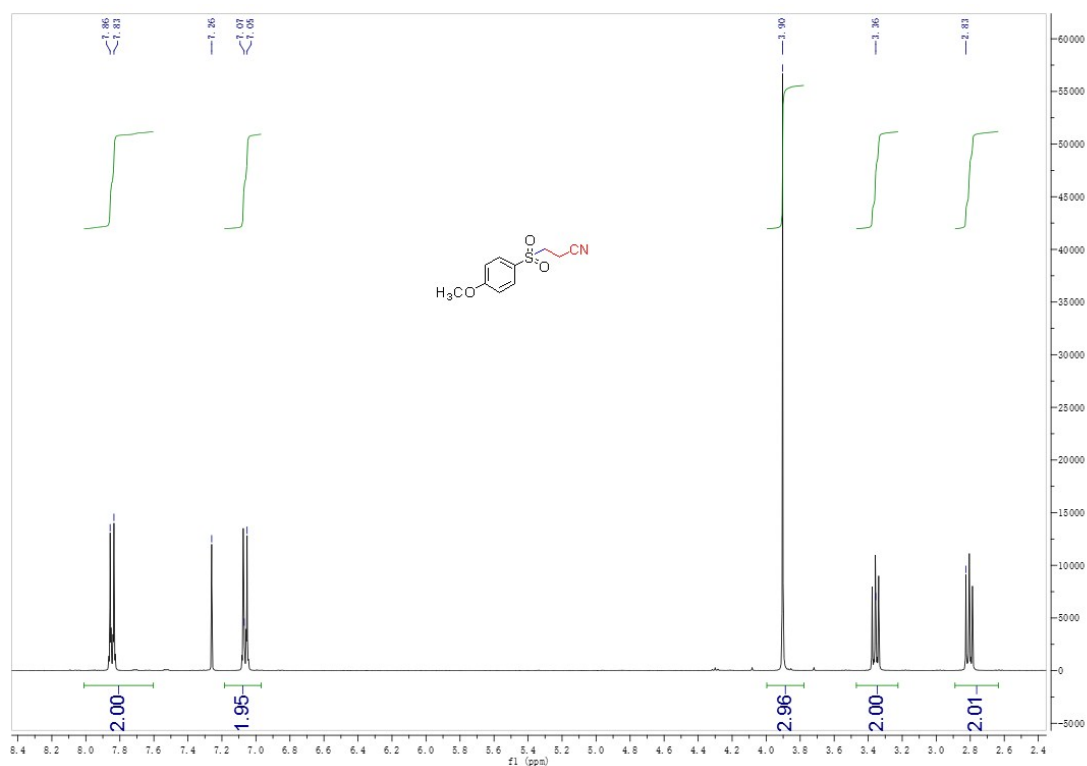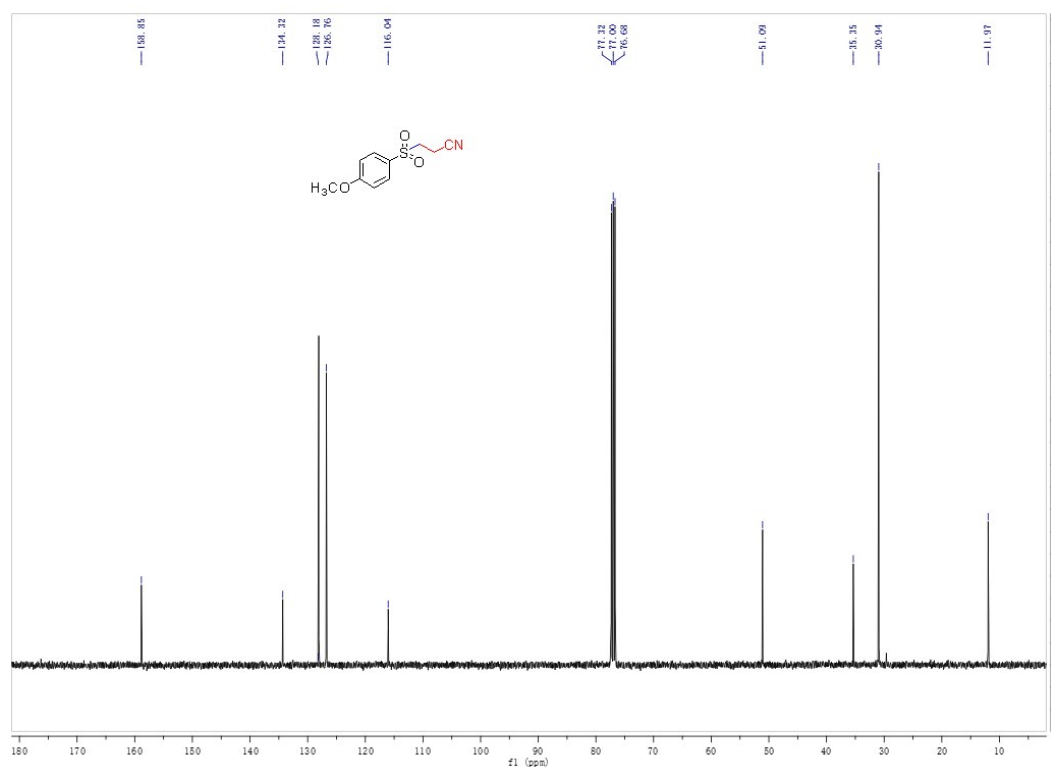

**3ea** 3-((4-(tert-butyl)phenyl)sulfonyl)-3-phenylpropanenitrile

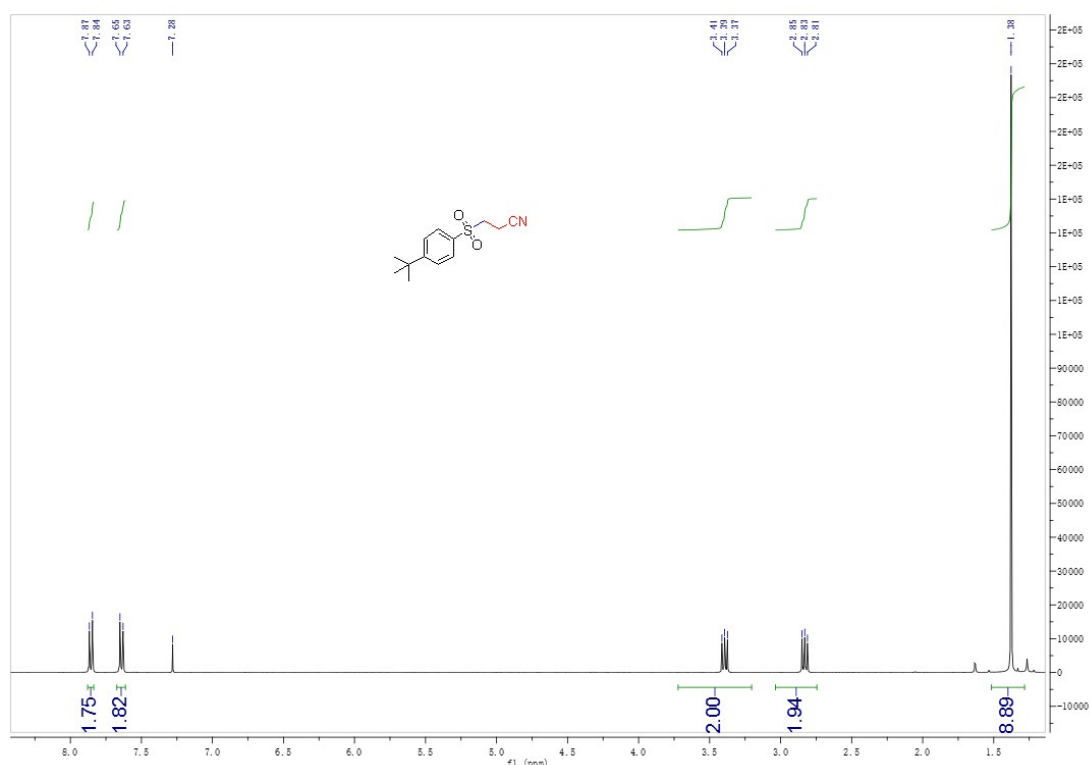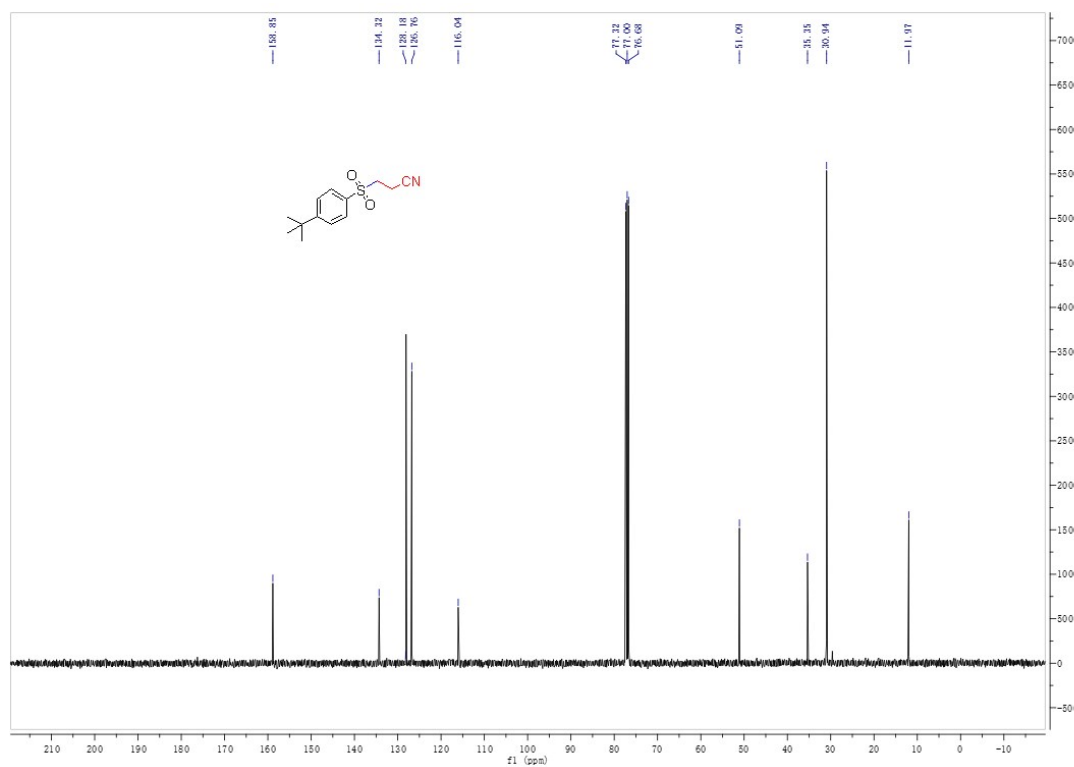

**3fa** 3-((4-fluorophenyl)sulfonyl)propanenitrile

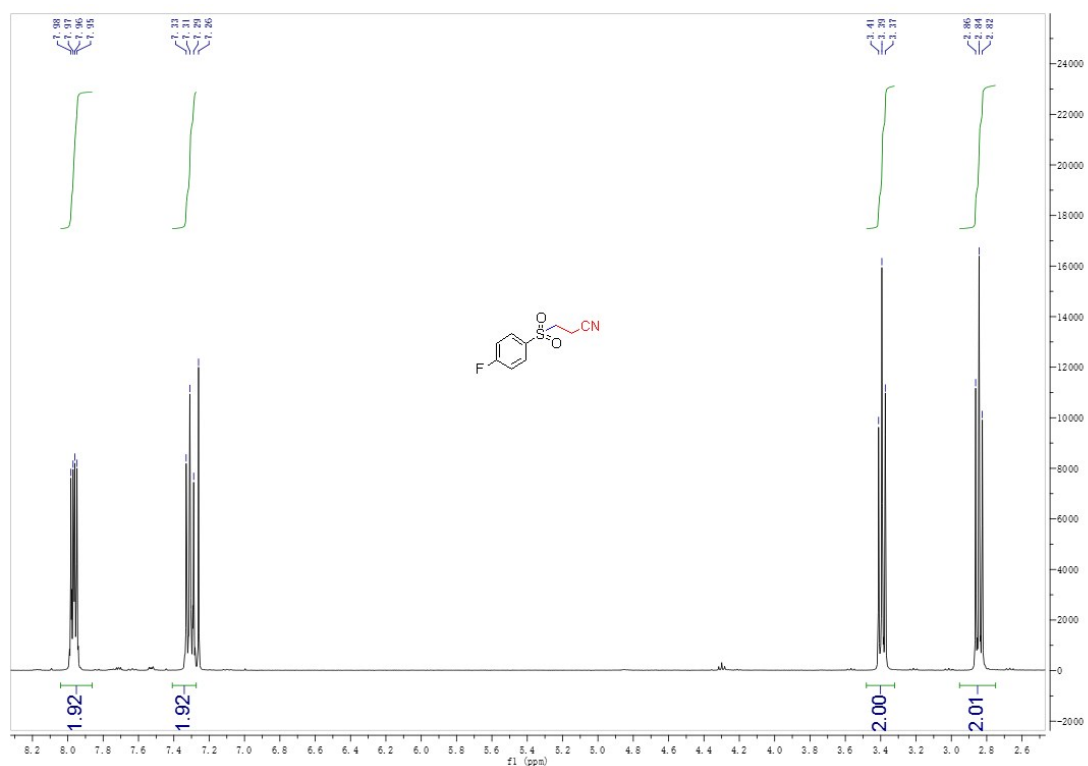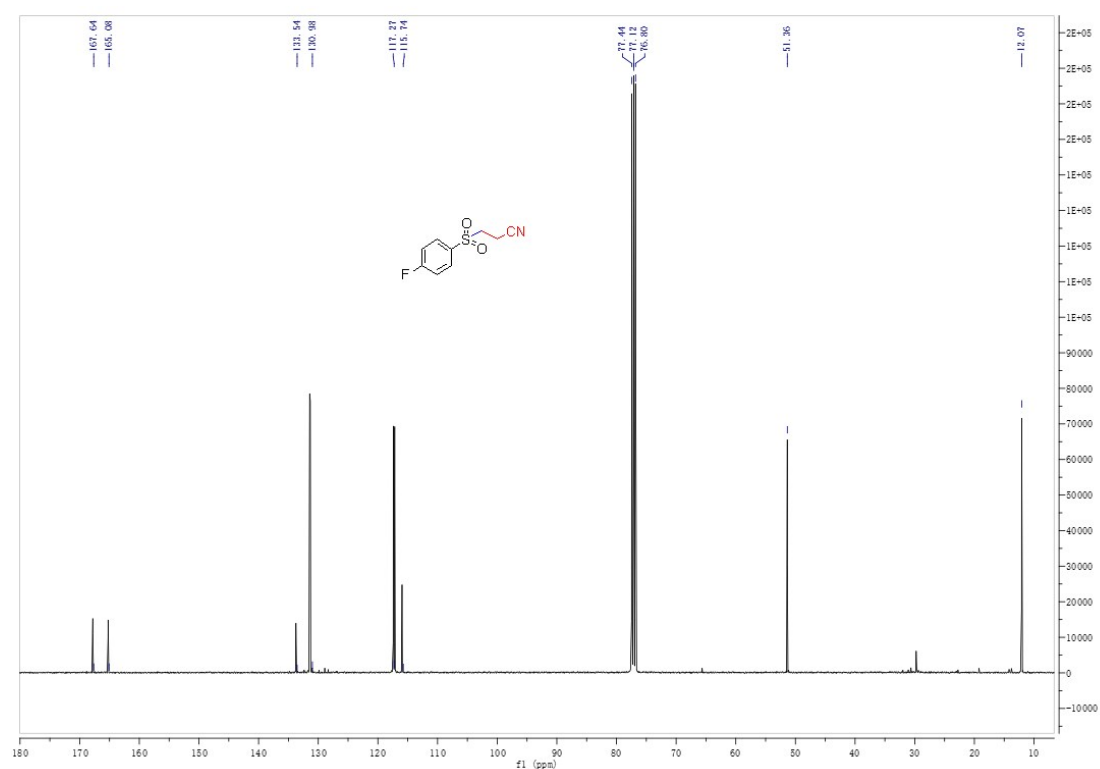

**3ga** 3-(benzylsulfonyl) propanenitrile

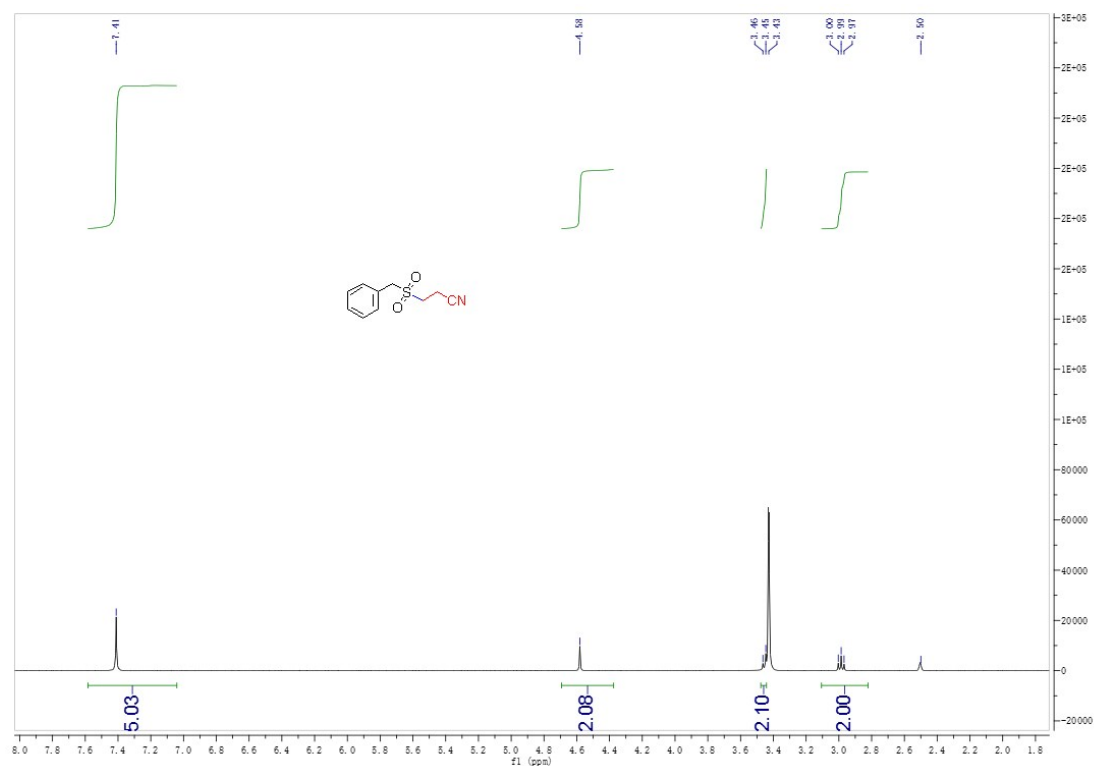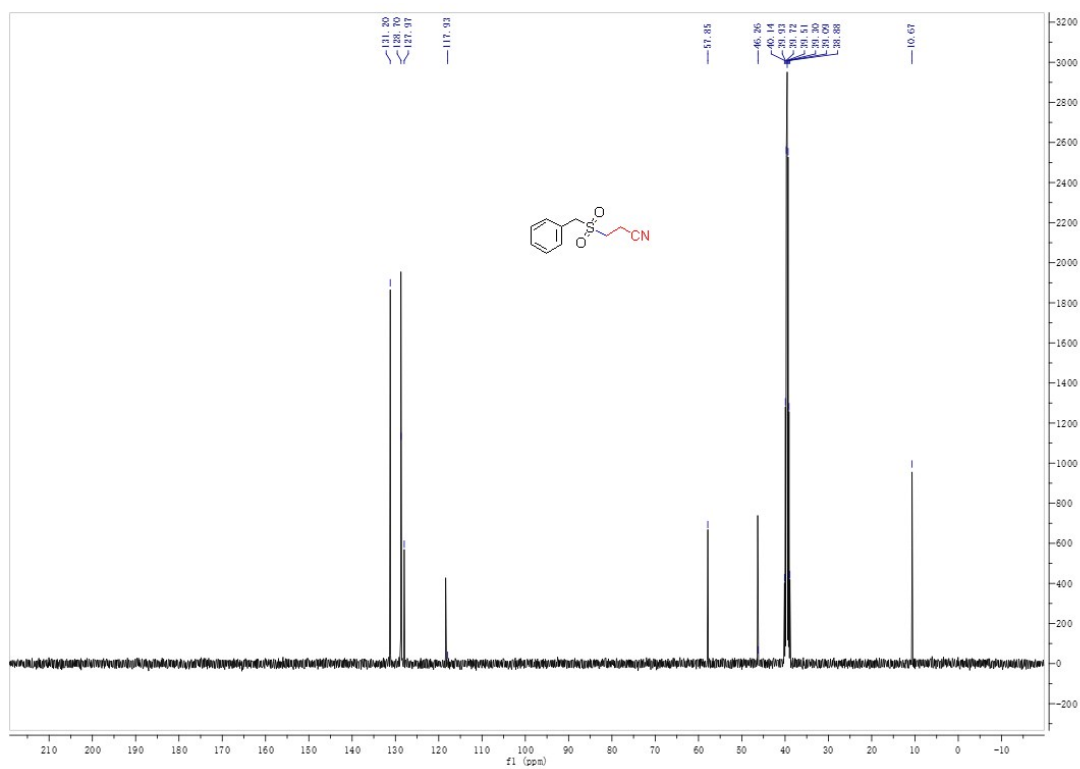



**3ha** 3-(thiophen-2-ylsulfonyl) propanenitrile

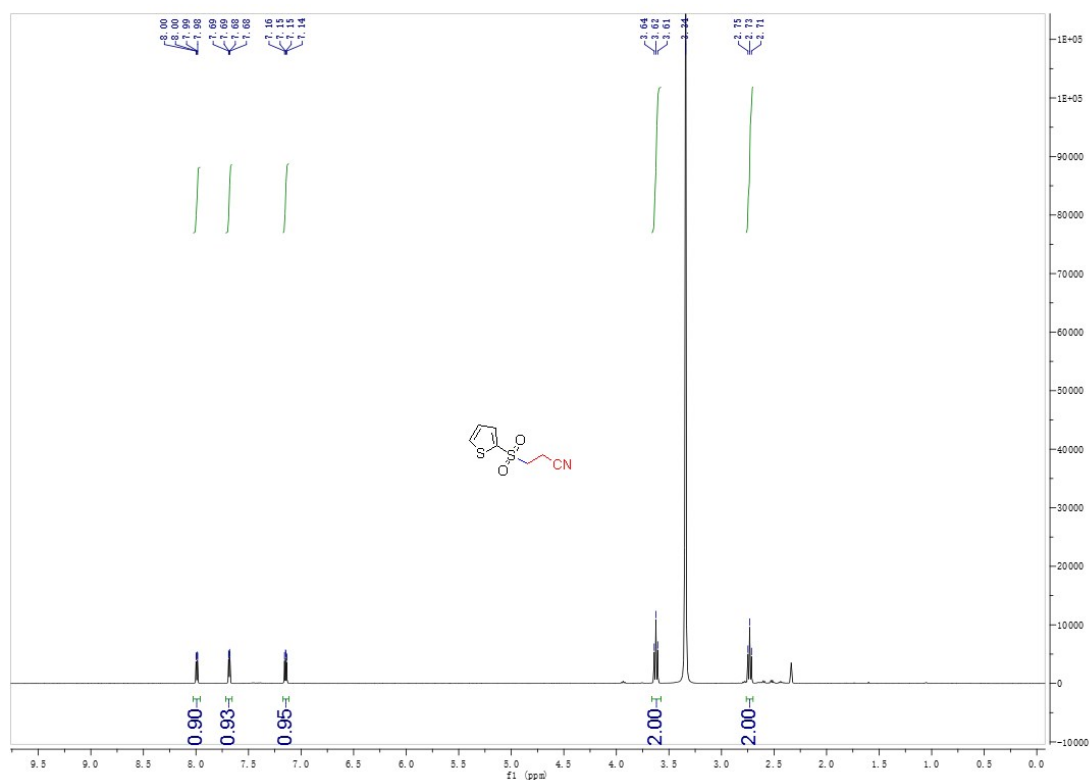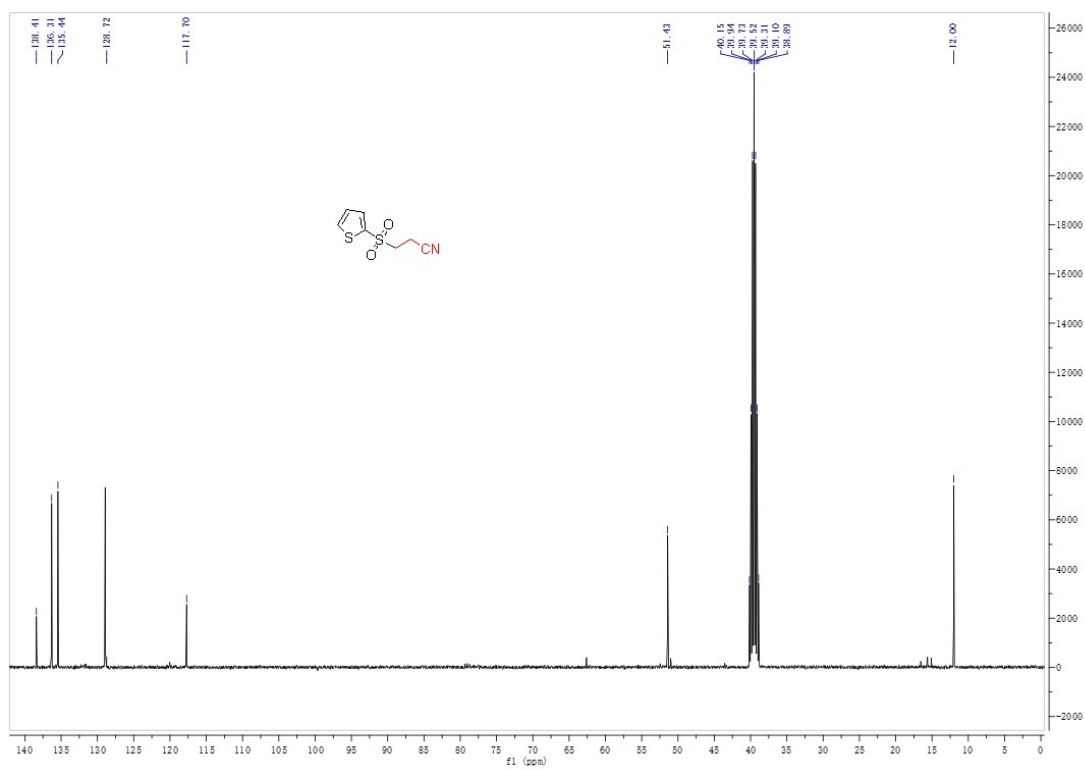

**3ia** 3-((2,4,6-triisopropylphenyl) sulfonyl) propanenitrile

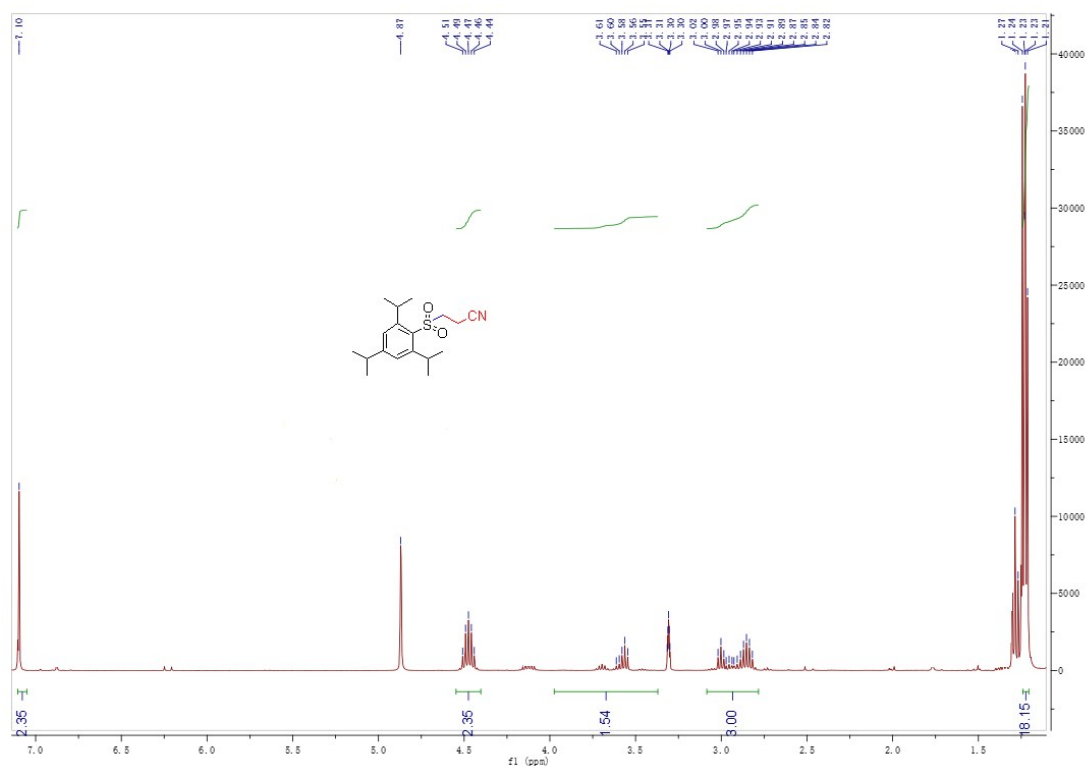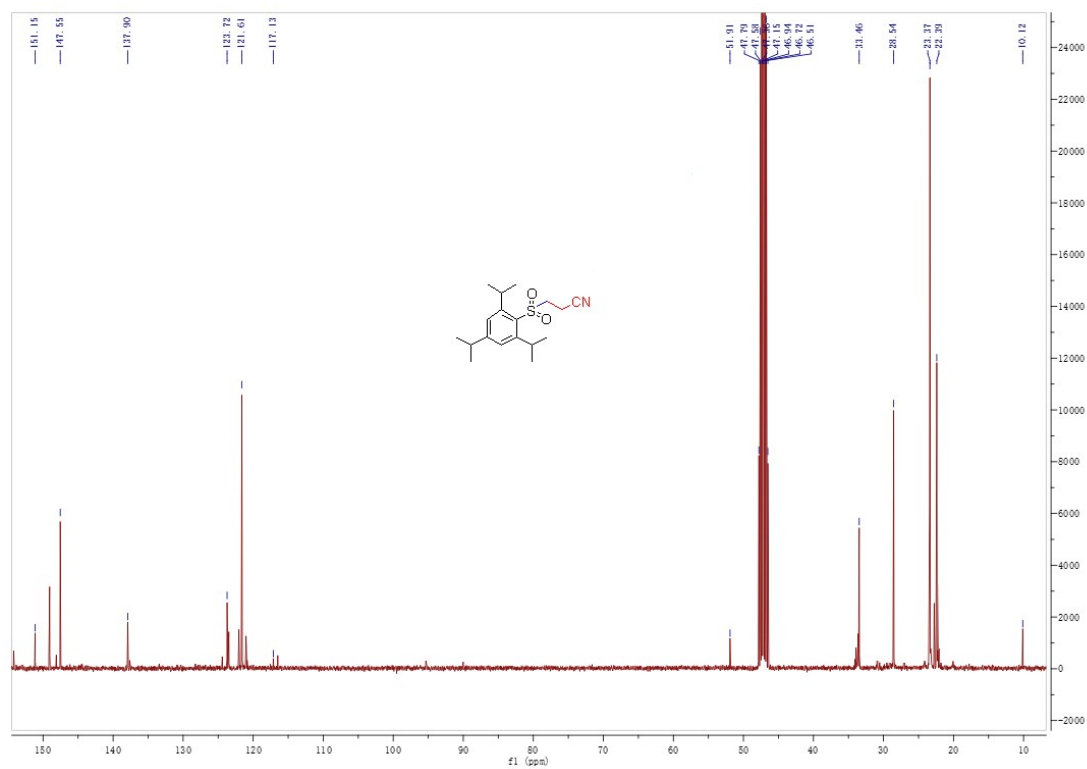

### 3ab 3-tosylbutanenitrile

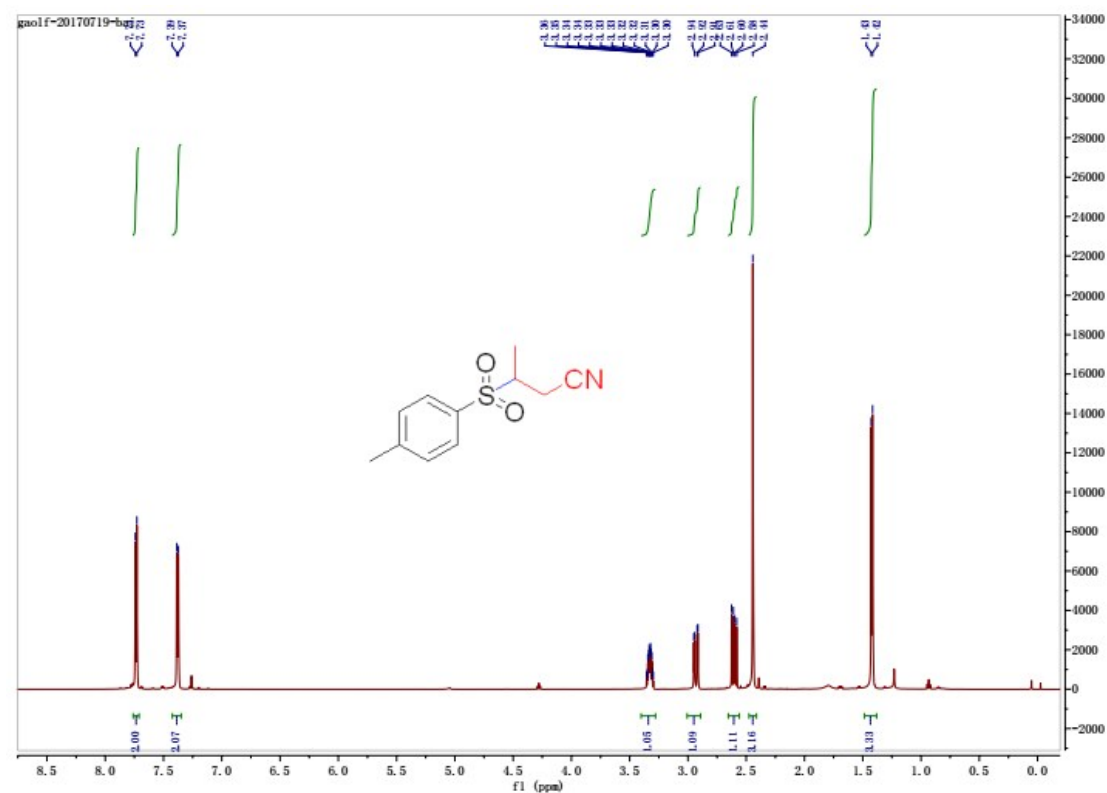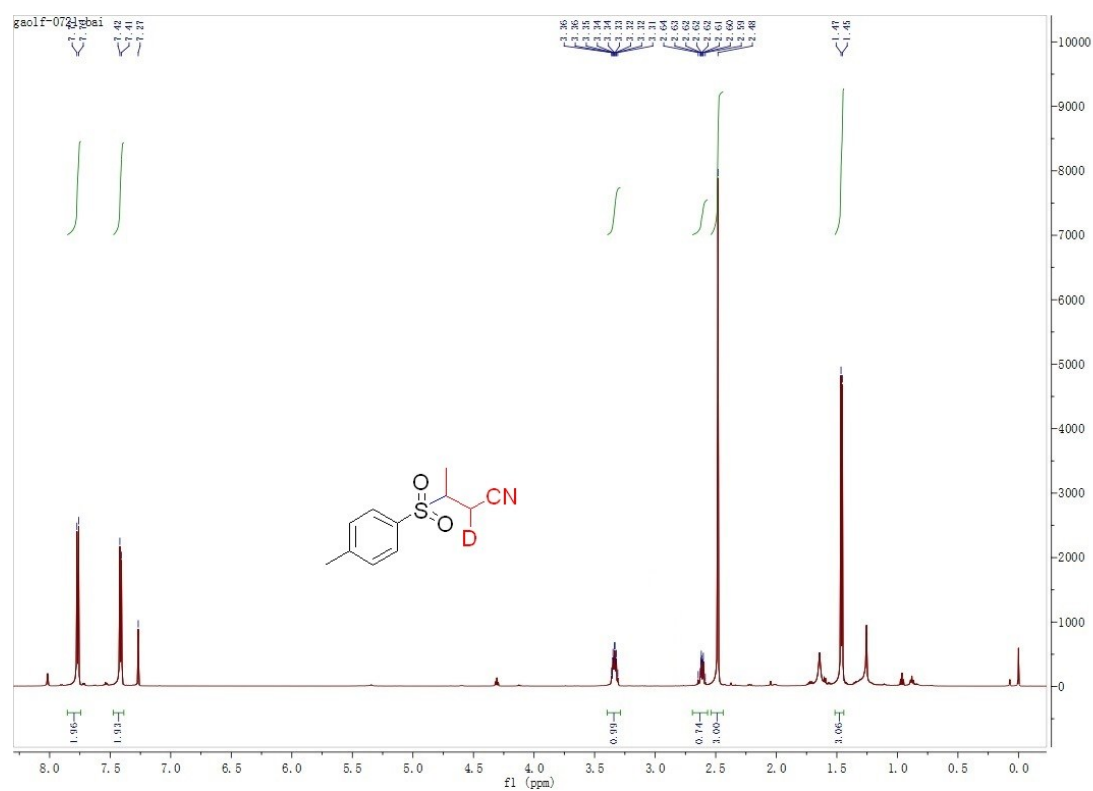

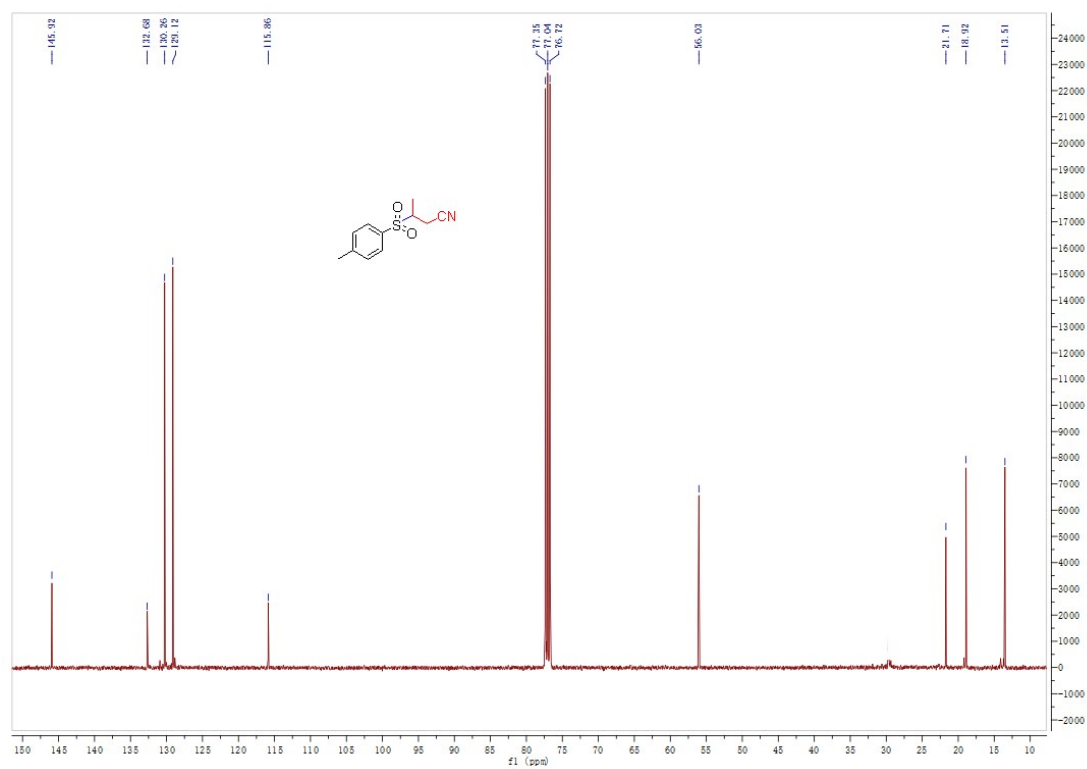

### 3bb 3-(phenylsulfonyl)butanenitrile

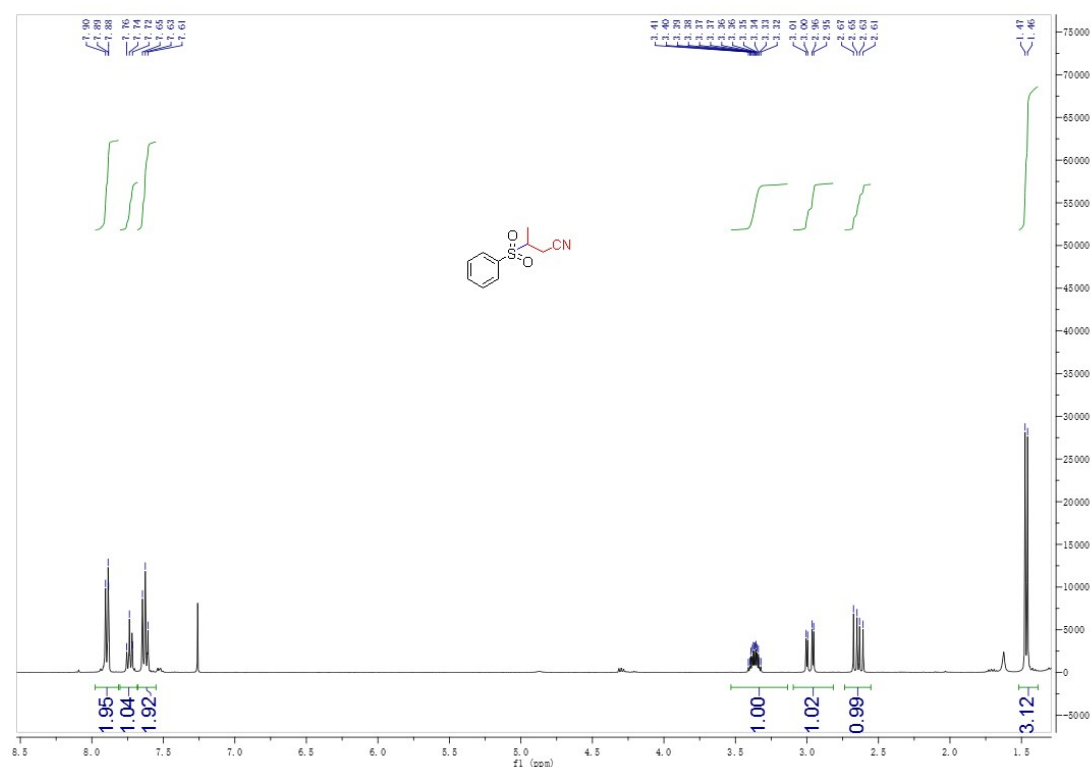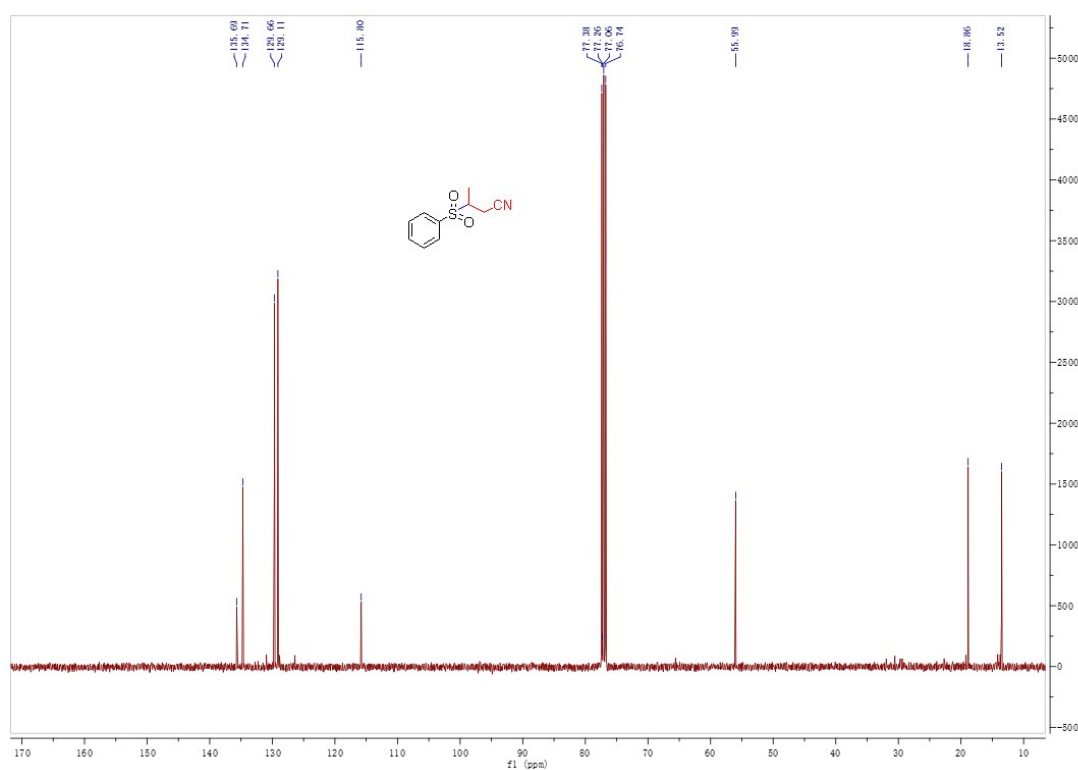

**3cb** 3-((4-nitrophenyl) sulfonyl) butanenitrile

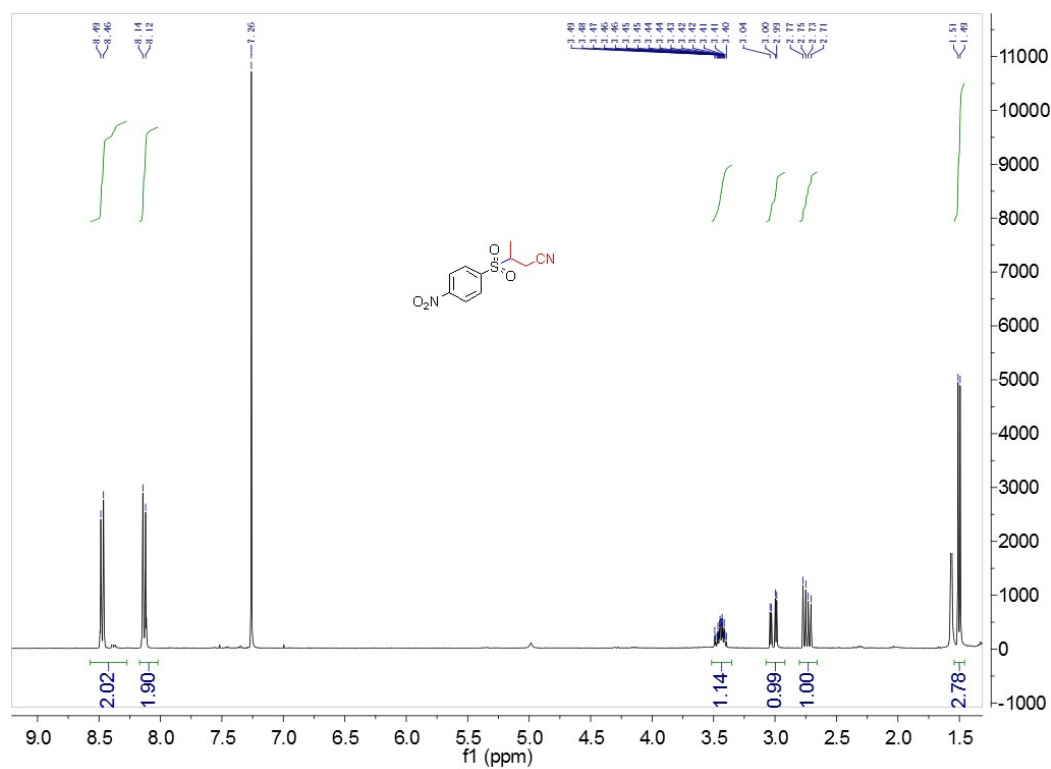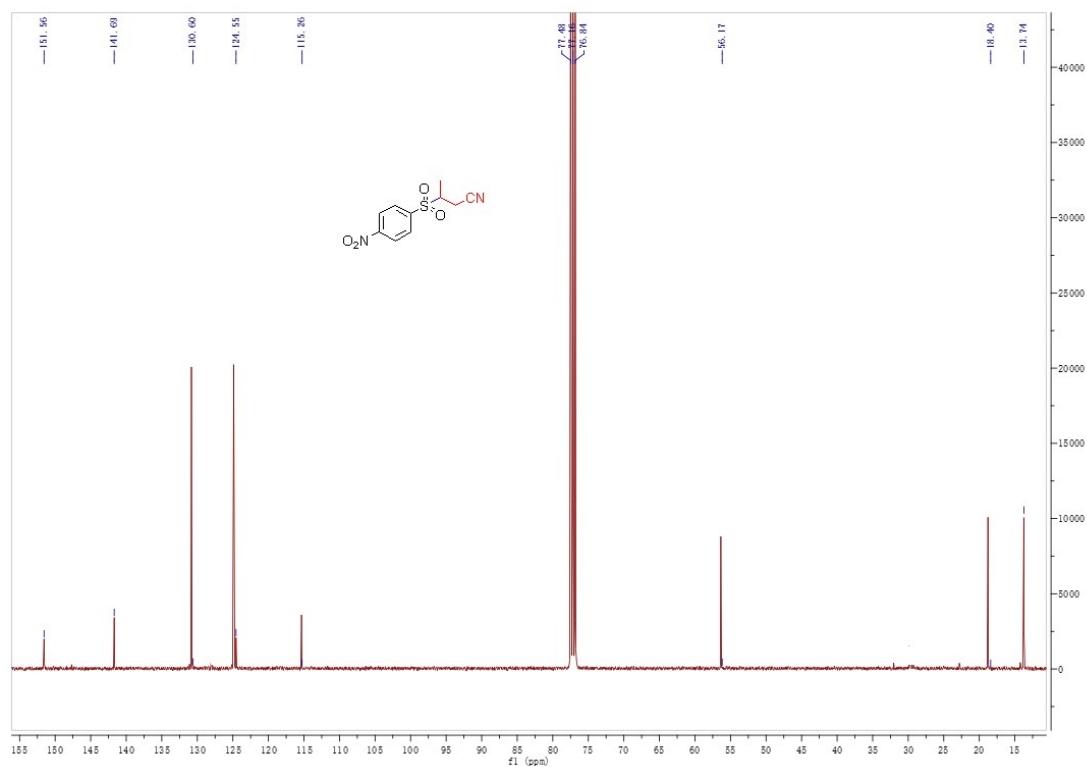

**3eb** 3-((4-(tert-butyl)phenyl)sulfonyl)butanenitrile

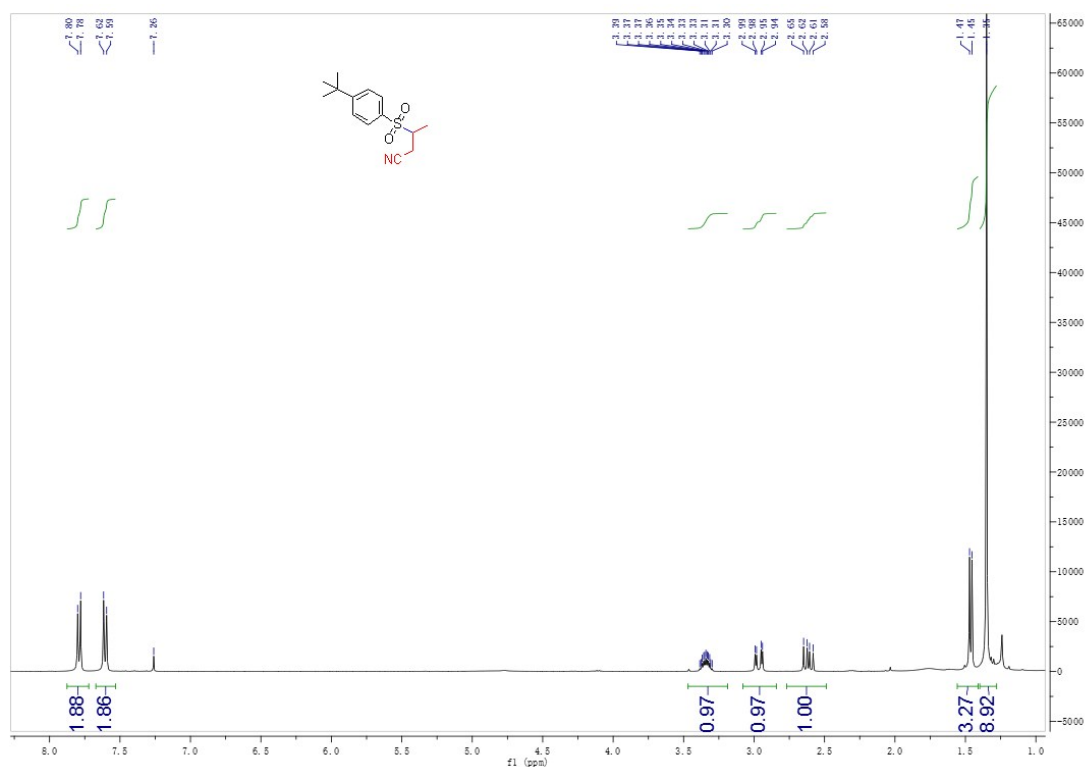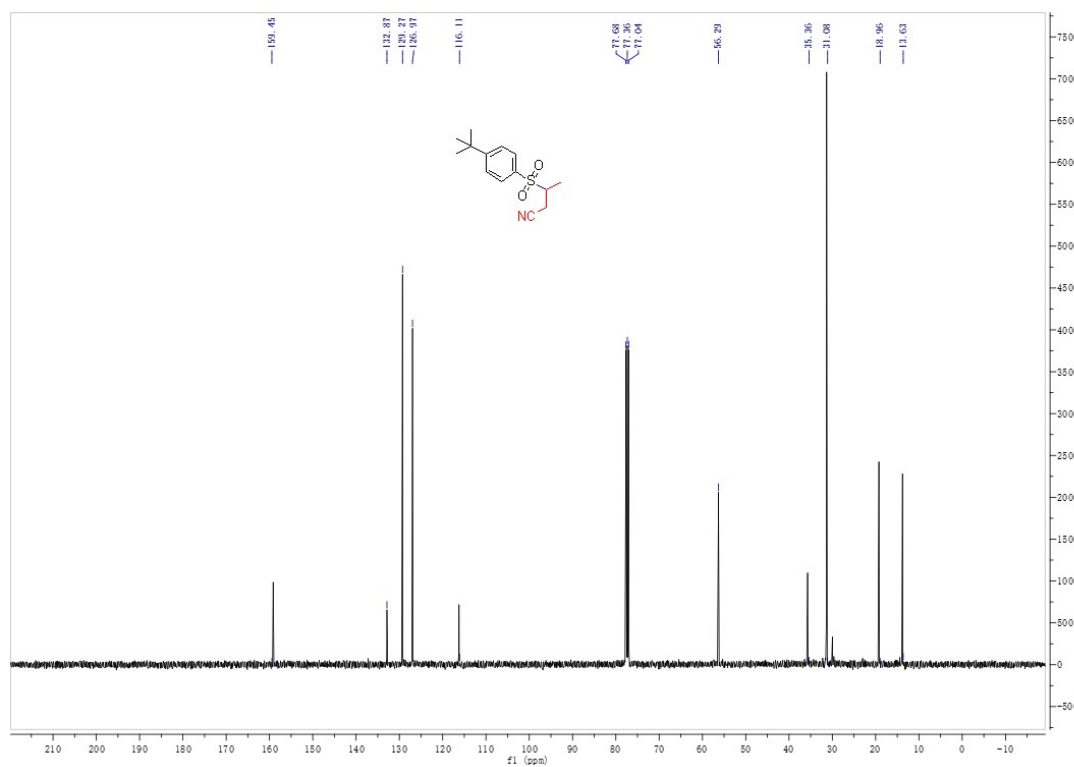

**3fb** 3-((4-fluorophenyl) sulfonyl)butanenitrile

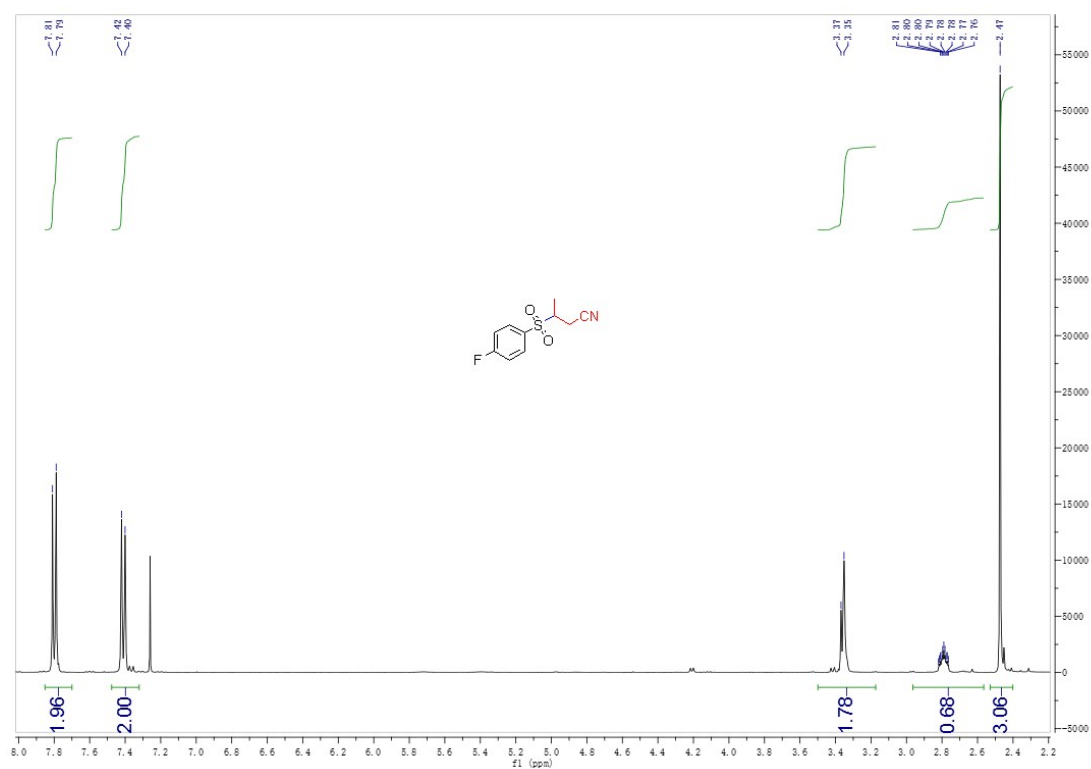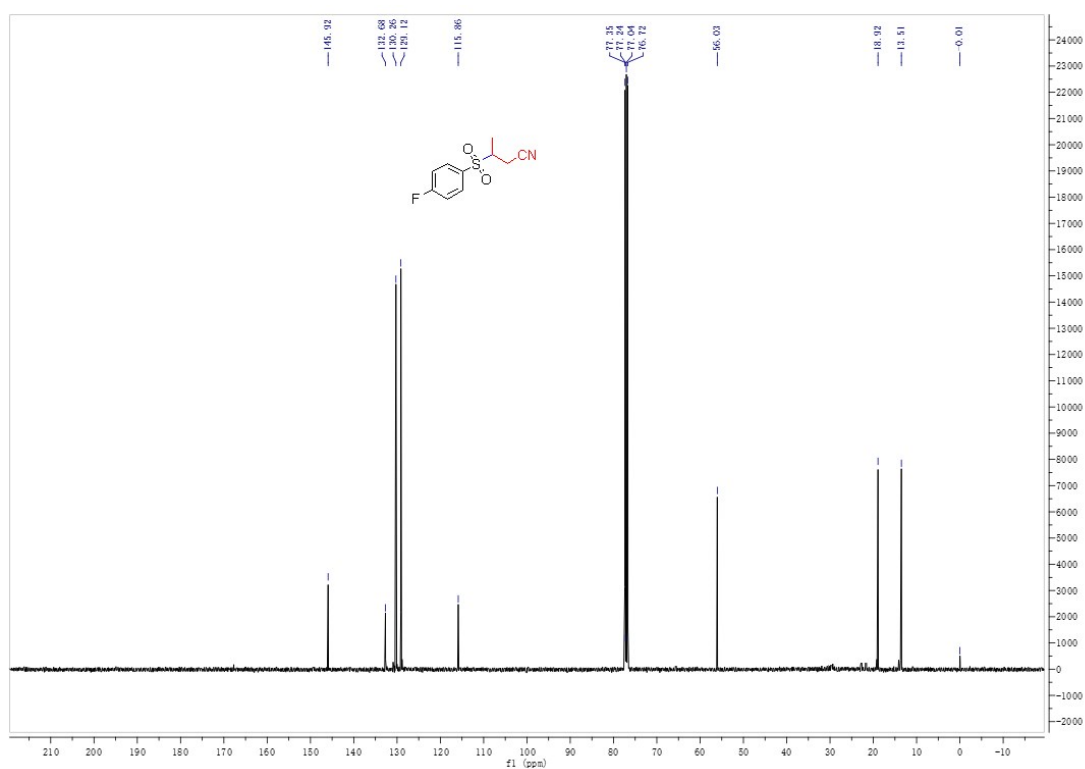



### 3gb 3-(benzylsulfonyl)butanenitrile

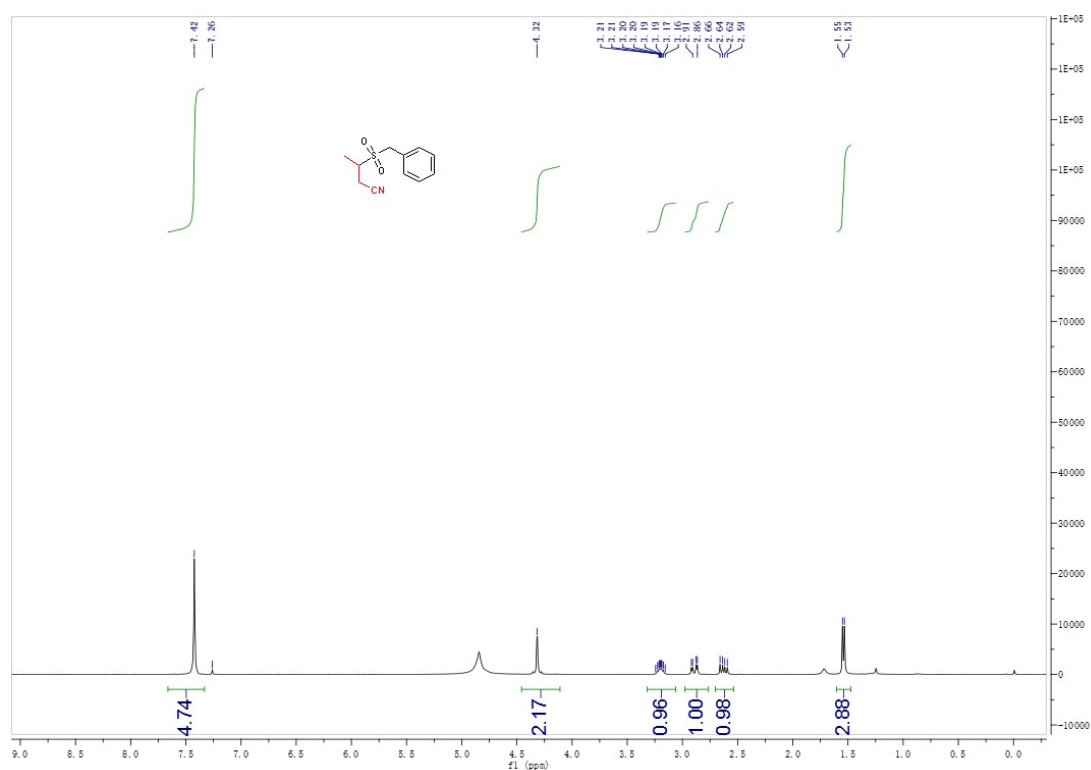

**3bc** 3-phenyl-3-(phenylsulfonyl)propanenitrile

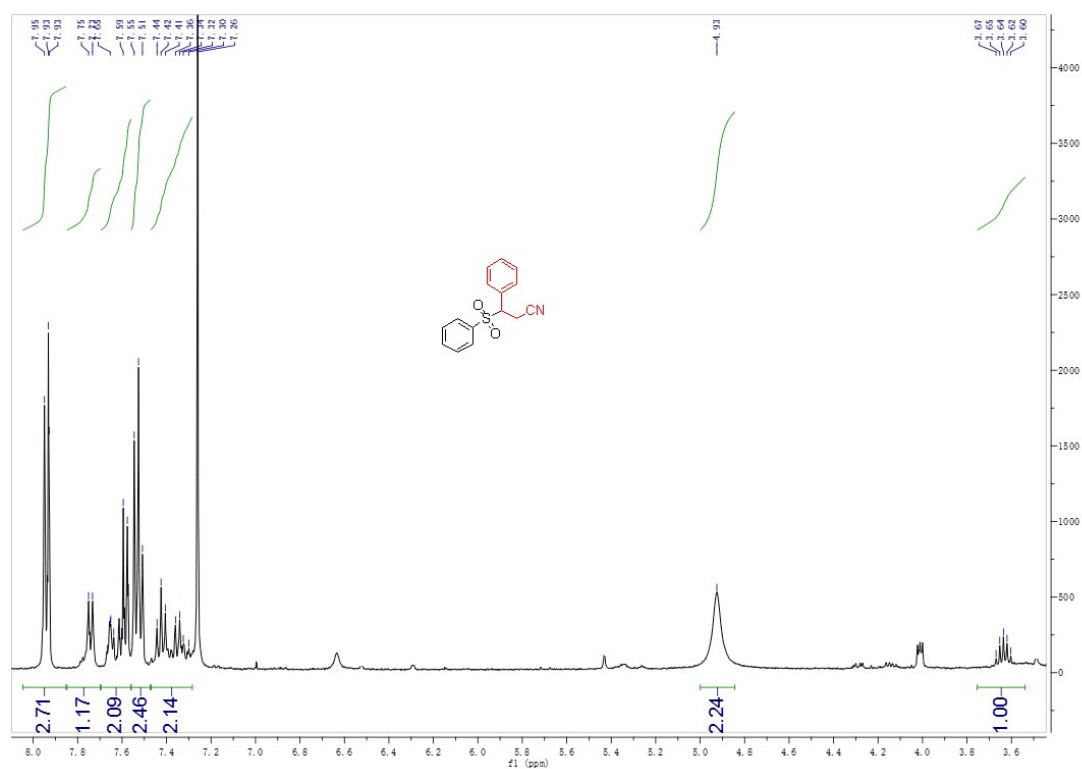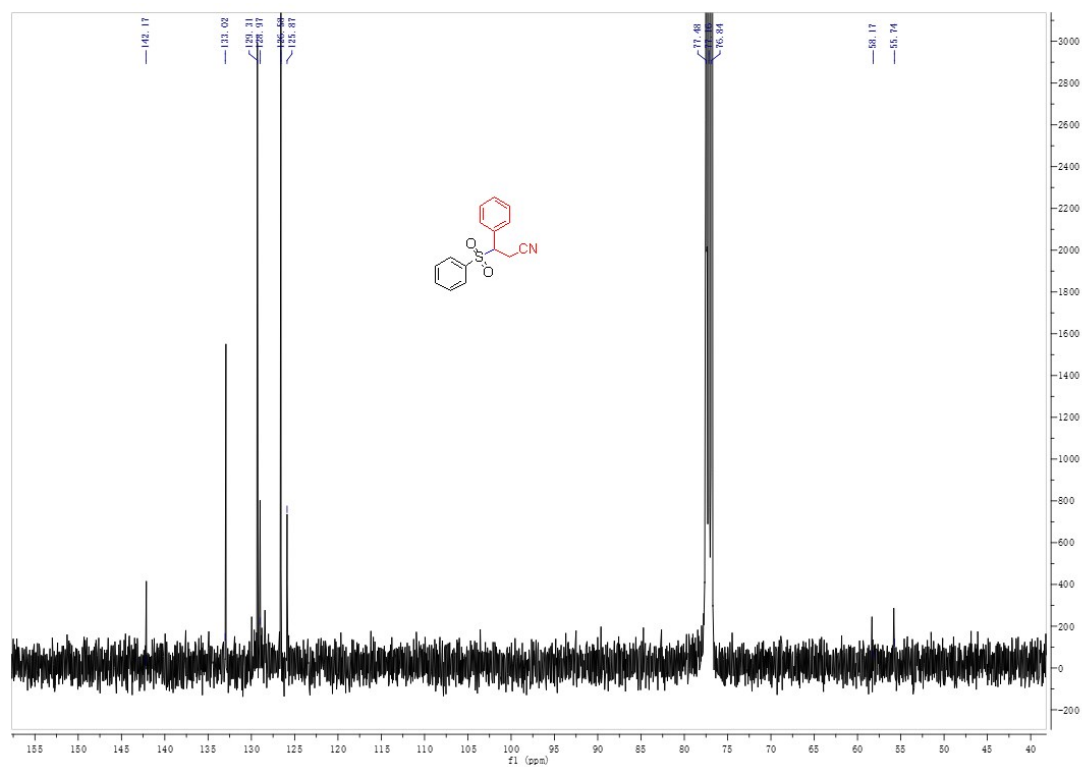

**3fc** 3-((4-fluorophenyl)sulfonyl)-3-phenylpropanenitrile

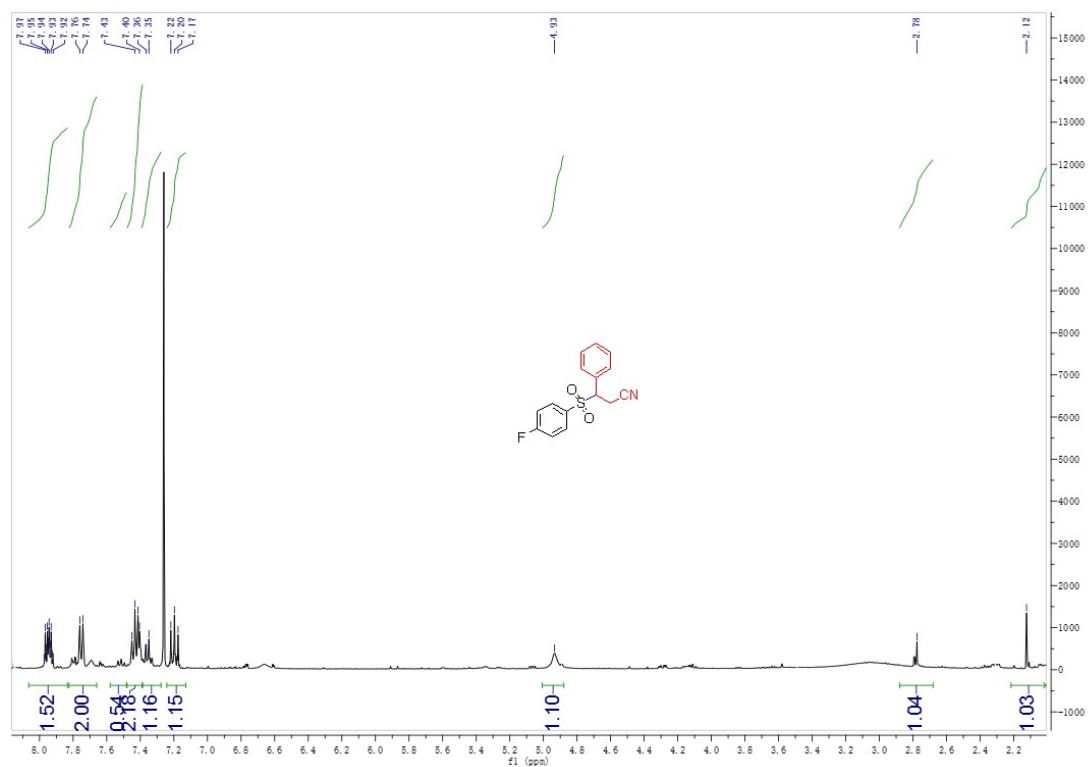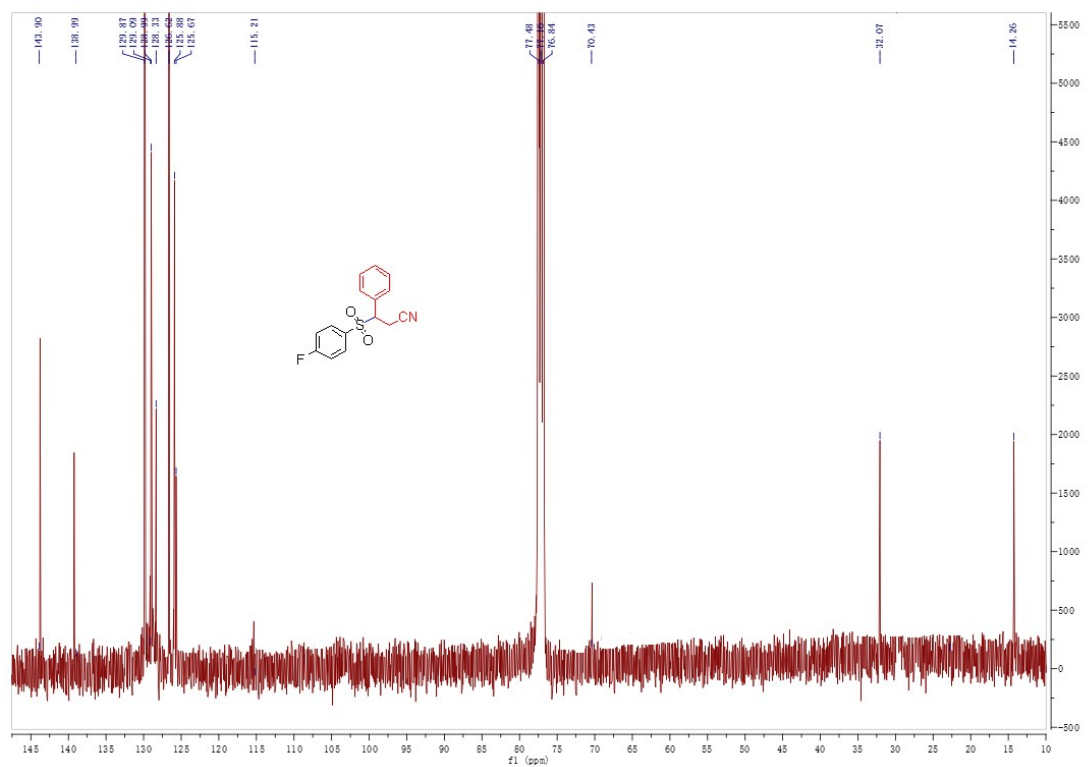

Supplement: c7ob01558e1.pdf [file c7ob01558e1.pdf]
